# Supplementary material for: First genome report and analysis of chicken H7N9 influenza viruses with poly-basic amino acids insertion in the hemagglutinin cleavage site
Source: PubMed Central journal article supplement (PMC5577273; doi:10.1038/s41598-017-10605-6), 2017-08-30
Supplement: 41598_2017_10605_MOESM1_ESM.pdf [file 41598_2017_10605_MOESM1_ESM.pdf]

**First genome report and analysis of chicken H7N9 influenza viruses with poly-basic amino acids insertion in the hemagglutinin cleavage site**

Jidang Chen<sup>1,2#</sup>, Jipei Zhang<sup>1#</sup>, Wanjun Zhu<sup>2</sup>, Yishan Zhang<sup>1</sup>, Hualong Tan<sup>1</sup>, Minfang Liu<sup>1</sup>,  
Mingsheng Cai<sup>3</sup>, Jiaren Shen<sup>4</sup>, Hinh Ly<sup>2\*</sup>, Jianhong Chen<sup>1\*</sup>

<sup>1</sup>College of Life Science and Engineering, Foshan University, Foshan, Chin

<sup>2</sup>Department of Veterinary & Biomedical Sciences, College of Veterinary Medicine,  
University of Minnesota, Twin Cites, Minnesota, USA

<sup>3</sup>Department of Pathogenic Biology and Immunology, Sino-French Hoffmann Institute,  
School of Basic Medical Science, Guangzhou Medical University, Guangzhou, Guangdong,  
China

<sup>4</sup>Shanghai Municipal Center For Disease Control And Prevention (SCDC), Shanghai,  
China

#These authors contributed equally to this study.

**\*Corresponding authors:**

Jianhong Chen

Professor of Preventive Veterinary Medicine

College of Life Science and Engineering, Foshan University, Foshan, China

Tel: +86-0757-85505088

E-mail: [jianhongchen.fsu@gmail.com](mailto:jianhongchen.fsu@gmail.com)

Hinh Ly

Associate Professor of Virology

University of Minnesota, Twin Cities

1988 Fitch Ave., Ste 295, AS/VM Bldg.

Saint Paul, MN 55108,

Tel: 612-625-3358

Email: [hly@umn.edu](mailto:hly@umn.edu)

Supplementary Table S1. Gene Accession Numbers of H7N9 viruses input for phylogenetic analysis

| Strain Name                              | Data           | Collected  | Host           | Collected        | Database Accession No. |          |          |          |          |          |          |          |
|------------------------------------------|----------------|------------|----------------|------------------|------------------------|----------|----------|----------|----------|----------|----------|----------|
|                                          | Base           | Date       |                | Region           | PB2                    | PB1      | PA       | HA       | NP       | NA       | M        | NS       |
| A/Chicken/Guangdong/J1/2017 <sup>a</sup> | N <sup>f</sup> | 2017-02-25 | A <sup>b</sup> | PRD <sup>d</sup> | KY855515               | KY855516 | KY855517 | KY855518 | KY855519 | KY855520 | KY855521 | KY855522 |
| A/Chicken/Guangdong/J2/2017 <sup>a</sup> | N              | 2017-02-25 | A              | PRD              | KY855523               | KY855524 | KY855525 | KY855526 | KY855527 | KY855528 | KY855529 | KY855530 |
| A/Anhui/01876/2014                       | G <sup>h</sup> | 2014-03-10 | H <sup>c</sup> | YRD <sup>d</sup> | 627398                 | 627399   | 627397   | 627401   | 627394   | 627400   | 627396   | 627395   |
| A/Anhui/09186/2014                       | G              | 2014-02-07 | H              | YRD              | 628029                 | 628030   | 628028   | 628032   | 628025   | 628031   | 628027   | 628026   |
| A/Anhui/1-YK RG56/2013                   | G              | 2015-08-27 | H              | YRD              | 637069                 | 637068   | 635611   | 637063   | 637066   | 637065   | 637064   | 637067   |
| A/Anhui/60936/2016                       | G              | 2016-12-16 | H              | YRD              | 887945                 | 887946   | 887944   | 887948   | 887941   | 887947   | 887943   | 887942   |
| A/Beijing/40610/2015                     | G              | 2015-05-26 | H              | PRD              | 628541                 | 628542   | 628540   | 628544   | 628537   | 628543   | 628539   | 628538   |
| A/chicken/Dongguan/210/2014              | G              | 2014-02-20 | A              | PRD              | 597186                 | 597187   | 591552   | 597188   | 597189   | 597190   | 597191   | 597192   |
| A/chicken/Dongguan/3438/2013             | G              | 2013-12-19 | A              | PRD              | 581697                 | 581702   | 576724   | 581703   | 581704   | 581705   | 581706   | 581707   |
| A/chicken/Dongguan/3487/2013             | G              | 2013-12-19 | A              | PRD              | 581715                 | 581716   | 576726   | 581717   | 581718   | 581719   | 581720   | 581721   |
| A/chicken/Dongguan/3491/2013             | G              | 2013-12-19 | A              | PRD              | 581729                 | 581730   | 576758   | 581731   | 581732   | 581733   | 581734   | 581735   |
| A/chicken/Ganzhou/GZ79/2016              | G              | 2016-01-27 | A              | PRD              | 942266                 | 942236   | 942206   | 942085   | 942176   | 942146   | 942116   | 942296   |
| A/Chicken/Guangdong/DG478/2014           | G              | 2014-11-25 | A              | PRD              | 580264                 | 580265   | 580266   | 580267   | 580268   | 580269   | 580270   | 580271   |
| A/Chicken/Guangdong/DG593/2014           | G              | 2014-12-12 | A              | PRD              | 580296                 | 580297   | 580298   | 580299   | 580300   | 580301   | 580304   | 580305   |
| A/chicken/Guangdong/G1/2013              | G              | 2013-05-05 | A              | PRD              | 576596                 | 576590   | 576560   | 576566   | 576578   | 576572   | 576602   | 576584   |
| A/chicken/Guangdong/G2/2013              | G              | 2013-05-05 | A              | PRD              | 576597                 | 576591   | 576561   | 576567   | 576579   | 576573   | 576603   | 576585   |
| A/chicken/Guangdong/G3/2013              | G              | 2013-05-05 | A              | PRD              | 576598                 | 576592   | 576562   | 576568   | 576580   | 576574   | 576604   | 576586   |
| A/Chicken/Guangdong/SW153/2015           | G              | 2015-02-05 | A              | PRD              | 580376                 | 580377   | 580378   | 580379   | 580380   | 580381   | 580382   | 580383   |
| A/chicken/Jiangxi/10882/2014             | G              | 2014-02-18 | A              | OR <sup>d</sup>  | 594176                 | 594177   | 591439   | 594178   | 594179   | 594180   | 594181   | 594182   |
| A/chicken/Jiangxi/14517/2014             | G              | 2014-04-20 | A              | OR               | 593158                 | 593159   | 577366   | 593160   | 593161   | 593162   | 593163   | 593164   |
| A/chicken/Jiangxi/18482/2014             | G              | 2014-06-15 | A              | OR               | 593467                 | 593468   | 577858   | 593469   | 593470   | 593471   | 593472   | 593473   |
| A/chicken/Jiangxi/9558/2014              | G              | 2014-02-16 | A              | OR               | 583923                 | 583924   | 577212   | 583925   | 583926   | 583927   | 583928   | 583929   |
| A/Chicken/Jilin/13188/2014               | G              | 2014-02-20 | A              | OR               | 457810                 | 457811   | 457809   | 528346   | 457806   | 528345   | 528341   | 528340   |
| A/chicken/Longquan/LQ78/2016             | G              | 2016-01-30 | A              | YRD              | 942258                 | 942228   | 942198   | 942077   | 942168   | 942138   | 942108   | 942288   |
| A/chicken/Rizhao/515/2013                | G              | 2013       | A              | OR               | 468997                 | 469192   | 487859   | 469657   | 470594   | 470344   | 515781   | 469515   |

|                                    |   |            |   |     |                |        |        |        |        |        |        |        |
|------------------------------------|---|------------|---|-----|----------------|--------|--------|--------|--------|--------|--------|--------|
| A/chicken/Shanghai/S1078/2013      | G | 2013-04-03 | A | YRD | 515775         | 515776 | 515777 | 457813 | 515779 | 457812 | 470073 | 457807 |
| A/chicken/Shantou/2537/2014        | G | 2014-04-16 | A | PRD | 593193         | 593194 | 577498 | 593195 | 593196 | 593197 | 457808 | 593199 |
| A/chicken/Shenzhen/138/2014        | G | 2014-02-19 | A | PRD | 578083         | 578084 | 576722 | 578085 | 578086 | 578087 | 593198 | 578089 |
| A/chicken/Shenzhen/1665/2013       | G | 2013-12-12 | A | PRD | 577950         | 577951 | 576689 | 577952 | 577953 | 577954 | 578088 | 577956 |
| A/chicken/Wenzhou/WZTSLG02/2015    | G | 2015-01    | A | YRD | 683200         | 683160 | 683245 | 682924 | 683072 | 683031 | 577955 | 683113 |
| A/chicken/Zhangzhou/8585/2014      | G | 2014-06-23 | A | OR  | 593643         | 593644 | 591402 | 593645 | 593646 | 593647 | 682985 | 593649 |
| A/chicken/Zhejiang/DTID-ZJU06/2013 | G | 2013-12    | A | YRD | 590923         | 590924 | 590925 | 590926 | 590927 | 590928 | 593648 | 590930 |
| A/Duck/Guangdong/DG103/2015        | G | 2015-01-07 | A | PRD | 580324         | 580325 | 580326 | 580327 | 580328 | 580329 | 590929 | 580331 |
| A/Fujian/02152/2017                | G | 2017-01-06 | H | OR  | 887617         | 887618 | 887616 | 887620 | 887613 | 887619 | 580330 | 887614 |
| A/Fujian/1/2016                    | G | 2016-01-13 | H | OR  | 833701         | 833702 | 833704 | 833705 | 833706 | 833707 | 887615 | 833709 |
| A/Fujian/2/2015                    | G | 2015-01-03 | H | OR  | 627462         | 627463 | 627461 | 627465 | 627458 | 627464 | 833708 | 627459 |
| A/Fujian/21/2014                   | G | 2014-12-29 | H | OR  | 627374         | 627375 | 627373 | 627377 | 627370 | 627376 | 627460 | 627371 |
| A/Fujian/54840/2016                | G | 2016-11-16 | H | OR  | 888081         | 888082 | 888080 | 888084 | 888077 | 888083 | 627372 | 888078 |
| A/GD-120/2015/H7N9/2015-03-10      | G | 2015-03-10 | H | PRD | 656503         | 656504 | 656502 | 656506 | 656499 | 656505 | 888079 | 656500 |
| A/GD-153/2014/H7N9/2014-05-08      | G | 2014-05-08 | H | PRD | 656239         | 656240 | 656238 | 656242 | 656235 | 656241 | 656501 | 656236 |
| A/Guangdong/036/2014               | G | 2014-01-13 | H | PRD | 628461         | 628462 | 628460 | 628464 | 628457 | 628463 | 656237 | 628458 |
| A/Guangdong/15SF043/2015           | G | 2015-01-23 | H | PRD | 627110         | 627111 | 627109 | 627113 | 627106 | 627112 | 628459 | 627107 |
| A/Guangdong/17SF003/2016           | G | 2017-01-03 | H | PRD | 919596         | 919597 | 919595 | 919607 | 919592 | 919606 | 627108 | 919601 |
| A/Guangdong/17SF006/2017           | G | 2017-01-12 | H | PRD | 509127         | 509126 | 509125 | 919599 | 509123 | 919598 | 919602 | 919593 |
| A/Guangdong/2/2013                 | G | 2013       | H | PRD | - <sup>e</sup> | -      | -      | 499628 | -      | 503535 | -      | -      |
| A/Guangdong/24997/2013             | G | 2013-11-30 | H | PRD | 628517         | 628518 | 628516 | 628520 | 628513 | 628519 | 628515 | 628514 |
| A/Guangdong/24999/2013             | G | 2013-12-16 | H | PRD | 628509         | 628510 | 628508 | 628512 | 628505 | 628511 | 628507 | 628506 |
| A/Guangdong/HP001/2017             | G | 2017-01-04 | H | PRD | 960354         | 960356 | 960358 | 960360 | 960362 | 960364 | 960366 | 960368 |
| A/Guangdong/SP440/2017             | G | 2017-01-04 | H | PRD | 960355         | 960357 | 960359 | 960361 | 960363 | 960365 | 960367 | 960369 |
| A/Guangdong-Guangzhou/XN00457/2014 | G | 2014-02-07 | H | PRD | 627750         | 627751 | 627749 | 627753 | 627746 | 627752 | 627748 | 627747 |
| A/Guangdong-Guangzhou/XN00588/2014 | G | 2014-02-16 | H | PRD | 627654         | 627655 | 627653 | 627657 | 627650 | 627656 | 627652 | 627651 |
| A/Hebei/01/2013                    | G | 2013-07-19 | H | OR  | 447865         | 447863 | 447862 | 509120 | 447858 | 509122 | 509121 | 509124 |
| A/Hubei/34007/2015                 | G | 2015-04-22 | H | OR  | 628613         | 628614 | 628612 | 628616 | 628609 | 628615 | 628611 | 628610 |

|                                     |   |            |   |     |        |        |        |        |        |        |        |        |
|-------------------------------------|---|------------|---|-----|--------|--------|--------|--------|--------|--------|--------|--------|
| A/Huizhou/01/2013                   | G | 2013-08-08 | H | PRD | 503496 | 503497 | 503518 | 503499 | 503500 | 503501 | 503502 | 503503 |
| A/Hunan/02285/2017                  | G | 2017-01-08 | H | OR  | 887641 | 887642 | 887640 | 887644 | 887637 | 887643 | 887639 | 887638 |
| A/Hunan/26937/2014                  | G | 2014-04-19 | H | OR  | 627845 | 627846 | 627844 | 627848 | 627841 | 627847 | 627843 | 627842 |
| A/Jiangsu/03/2013                   | G | 2013-04-06 | H | YRD | 439488 | 439489 | 439490 | 447602 | 439491 | 447857 | 447855 | 447860 |
| A/Jiangsu/60456/2016                | G | 2016-12-02 | H | YRD | 887929 | 887930 | 887928 | 887932 | 887925 | 887931 | 887927 | 887926 |
| A/Jiangsu/60457/2016                | G | 2016-12-06 | H | YRD | 887921 | 887922 | 887920 | 887924 | 887917 | 887923 | 887919 | 887918 |
| A/Jiangsu/60466/2016                | G | 2016-11-21 | H | YRD | 887825 | 887826 | 887824 | 887828 | 887821 | 887827 | 887823 | 887822 |
| A/Nanchang/1/2013                   | G | 2013-04-24 | H | OR  | 453601 | 453602 | 453620 | 460535 | 453605 | 467774 | 461480 | 461481 |
| A/Nanjing/1/2013                    | G | 2013-03-28 | H | YRD | 919604 | 919605 | 919603 | 453604 | 919600 | 453606 | 453607 | 453608 |
| A/Nanjing/5/2013                    | G | 2013-04-25 | H | YRD | 460772 | 460773 | 460774 | 460775 | 460776 | 460777 | 460778 | 460779 |
| A/Qingyuan/GIRD1/2017               | G | 2017-01-14 | H | PRD | 918730 | 918732 | 918734 | 918736 | 918737 | 918738 | 918739 | 918740 |
| A/Quzhou/1/2015                     | G | 2015-04-25 | H | YRD | 621126 | 621125 | 621113 | 621120 | 621123 | 621121 | 621122 | 621124 |
| A/Shanghai/1/2013                   | G | 2013-02-26 | H | YRD | 528343 | 528344 | 528342 | 439486 | 528339 | 439487 | 439493 | 439494 |
| A/Shanghai/Patient6/2013            | G | 2013-05-01 | H | YRD | 451269 | 451270 | 451271 | 451272 | 451273 | 451274 | 451275 | 451276 |
| A/silkie chicken/Dongguan/3606/2013 | G | 2013-12-19 | A | PRD | 581836 | 581837 | 577199 | 581838 | 581839 | 581840 | 581841 | 581870 |
| A/silkie chicken/Dongguan/656/2014  | G | 2014-02-20 | A | PRD | 596828 | 596829 | 591518 | 596830 | 596831 | 596832 | 596833 | -      |
| A/silkie chicken/Jiangxi/9476/2014  | G | 2014-02-16 | A | YRD | 583903 | 583904 | 577202 | 583905 | 583906 | 583907 | 583908 | 583950 |
| A/Xinjiang/73030/2014               | G | 2014-07-25 | H | OR  | 627917 | 627918 | 627916 | 627920 | 627913 | 627919 | 627915 | 627914 |
| A/Xinjiang/75802/2014               | G | 2014-08-15 | H | OR  | 627829 | 627830 | 627828 | 627832 | 627825 | 627831 | 627827 | 627826 |
| A/XinjiangBintuan/99117/2014        | G | 2014-10-25 | H | OR  | 566097 | 566098 | 566096 | 566100 | 566093 | 566099 | 566095 | 566094 |
| A/XinjiangBintuan/99118/2014        | G | 2014-11-20 | H | OR  | 566105 | 566106 | 566104 | 566108 | 566101 | 566107 | 566103 | 566102 |
| A/Zhejiang/1/2017                   | G | 2017-01-07 | H | YRD | 887721 | 887722 | 887720 | 887724 | 887717 | 887723 | 887719 | 887718 |
| A/Zhejiang/19/2016                  | G | 2016-12-28 | H | YRD | 887673 | 887674 | 887672 | 887676 | 887669 | 887675 | 887671 | 887670 |
| A/Zhejiang/22/2013                  | G | 2013-10-14 | H | YRD | 477407 | 477408 | 477409 | 477410 | 477411 | 477412 | 477413 | 477414 |
| A/Zhejiang/5/2017                   | G | 2017-01-02 | H | YRD | 887657 | 887658 | 887656 | 887660 | 887653 | 887659 | 887655 | 887654 |
| A/Zhejiang/6/2016                   | G | 2016-10-07 | H | YRD | 887801 | 887802 | 887800 | 887804 | 887797 | 887803 | 887799 | 887798 |
| A/Zhejiang/6/2017                   | G | 2017-01-05 | H | YRD | 887649 | 887650 | 887648 | 887652 | 887645 | 887651 | 887647 | 887646 |
| A/Zhejiang/8/2015                   | G | 2015-02-02 | H | YRD | 628765 | 628766 | 628764 | 628768 | 628761 | 628767 | 628763 | 628762 |

**Note**

- a. The accession numbers of A/Chicken/Guangdong/J1/2017 and A/Chicken/Guangdong/J2/2017 were assigned by National Center of Biology Information (NCBI), the accession number of the rest strains were assigned by Global Initiative on Sharing All Influenza Data (GISAID). The first 3 characters “EPI” of all the accession number assigned by GISAID were omitted in the table.
- b. Letter “A” represent “Avian”
- c. Letter “H” represent “Human”
- d. Abbreviation: “YRD” represent Yangtze River Delta, “PRD” represent Pearl River Delta and OR represent other regions.
- e. “-” indicate the sequence information was not available in both GISAID or NCBI, and the indicated sequences were not included in the phylogenetic trees calculation.
- f. Letter “N” represent “NCBI” database.
- h. Letter “G” represent “GISAID” database.

Supplementary Table S2. HA and NA gene Accession Numbers of H7N9 viruses input for molecular clock analysis

| Strain Name                        | Data | Isolated<br>Date | Database Accession No. |        | Host  | Isolated Region |
|------------------------------------|------|------------------|------------------------|--------|-------|-----------------|
|                                    | Base |                  | HA                     | NA     |       |                 |
| A/Anhui/1-YK RG182/2013            | G    | 2013             | 637962                 | 637964 | Human | YRD             |
| A/chicken/Henan/102/2013           | G    | 2013             | 692155                 | 691756 | Avian | OR              |
| A/chicken/Henan/115/2013           | G    | 2013             | 692162                 | 691763 | Avian | OR              |
| A/chicken/Henan/120/2013           | G    | 2013             | 692164                 | 691765 | Avian | OR              |
| A/chicken/Henan/141/2013           | G    | 2013             | 692165                 | 691766 | Avian | OR              |
| A/Shanghai/1/2013                  | G    | 2013-02-26       | 439486                 | 439487 | Human | YRD             |
| A/Minhang/S01/2013                 | G    | 2013-02-27       | 941039                 | 941041 | Human | YRD             |
| A/Shanghai/3/2013                  | G    | 2013-02-27       | 443022                 | 443023 | Human | YRD             |
| A/Shanghai/02/2013                 | G    | 2013-03-05       | 568648                 | 448938 | Human | YRD             |
| A/Shanghai/4664T/2013              | G    | 2013-03-05       | 446962                 | 446965 | Human | YRD             |
| A/Zhejiang/1/2013                  | G    | 2013-03-24       | 443034                 | 443036 | Human | YRD             |
| A/chicken/Anhui-Chuzhou/01/2013    | G    | 2013-03-29       | 447600                 | 447884 | Avian | YRD             |
| A/Wuxi/2/2013                      | G    | 2013-03-31       | 467313                 | 467315 | Human | YRD             |
| A/chicken/Jiangsu/1021/2013        | G    | 2013-04          | 499887                 | 499886 | Avian | YRD             |
| A/chicken/Zhejiang/C483/2013       | G    | 2013-04          | 532303                 | 532271 | Avian | YRD             |
| A/chicken/Zhejiang/DTID-ZJU01/2013 | G    | 2013-04          | 442721                 | 442723 | Avian | YRD             |
| A/Zhejiang/32/2013                 | G    | 2013-04          | 476480                 | -      | Human | YRD             |
| A/Anhui/04/2013                    | G    | 2013-04-01       | 509086                 | 509084 | Human | YRD             |
| A/pigeon/Shanghai/S1421/2013       | G    | 2013-04-03       | 457637                 | 457636 | Avian | YRD             |
| A/Shanghai/ION/2013                | G    | 2013-04-04       | 585979                 | 585980 | Human | YRD             |
| A/chicken/Wuxi/0405005/2013        | G    | 2013-04-05       | 663437                 | 663451 | Avian | YRD             |
| A/chicken/Jiangxi/12544/2013       | G    | 2013-04-07       | 583207                 | 583209 | Avian | OR              |
| A/chicken/Jiangxi/12564/2013       | G    | 2013-04-07       | 591857                 | 591859 | Avian | OR              |
| A/Chicken/Nanjing/761/2013         | G    | 2013-04-09       | 515788                 | 515790 | Avian | YRD             |
| A/Suzhou/3/2013                    | G    | 2013-04-09       | 497894                 | 497896 | Human | YRD             |
| A/Nanjing/6/2013                   | G    | 2013-04-11       | 497902                 | 497904 | Human | YRD             |
| A/Suzhou/5/2013                    | G    | 2013-04-12       | 497910                 | 497912 | Human | YRD             |
| A/Nanjing/7/2013                   | G    | 2013-04-13       | 497918                 | 497920 | Human | YRD             |
| A/chicken/Jiangsu/SC035/2013       | G    | 2013-04-16       | 457869                 | 457868 | Avian | YRD             |
| A/chicken/Jiangsu/SC537/2013       | G    | 2013-04-16       | 457853                 | 457852 | Avian | YRD             |
| A/Hangzhou/254/2013                | G    | 2013-04-17       | 450842                 | 450844 | Human | YRD             |
| A/Shanghai/MH01/2013               | G    | 2013-04-17       | 542311                 | 542313 | Human | YRD             |
| A/wild pigeon/Jiangsu/SD001/2013   | G    | 2013-04-17       | 457621                 | 457620 | Avian | YRD             |
| A/Anhui/03/2013                    | G    | 2013-04-21       | 447630                 | 447632 | Human | YRD             |
| A/chicken/Zhejiang/SD007/2013      | G    | 2013-04-22       | 457765                 | 457764 | Avian | YRD             |
| A/Jiangsu/Wuxi04/2013              | G    | 2013-04-26       | 756011                 | 756016 | Human | YRD             |
| A/Fujian/02/2013                   | G    | 2013-04-27       | 509087                 | 509089 | Human | OR              |
| A/Fujian/05/2013                   | G    | 2013-04-27       | 509118                 | 509119 | Human | OR              |
| A/Fujian/03/2013                   | G    | 2013-04-29       | 509102                 | 509100 | Human | OR              |
| A/Fujian/04/2013                   | G    | 2013-05-02       | 509103                 | 509105 | Human | OR              |
| A/chicken/Guangdong/SD641/2013     | G    | 2013-05-03       | 457885                 | 457884 | Avian | PRD             |

|                                     |   |            |        |        |       |     |
|-------------------------------------|---|------------|--------|--------|-------|-----|
| A/chicken/Jiangxi/SD001/2013        | G | 2013-05-03 | 457845 | 457844 | Avian | OR  |
| A/chicken/Guangdong/G1/2013         | G | 2013-05-05 | 576566 | 576572 | Avian | PRD |
| A/chicken/Guangdong/G3/2013         | G | 2013-05-05 | 576568 | 576574 | Avian | PRD |
| A/chicken/Hangzhou/174/2013         | G | 2013-05-05 | 639587 | 639589 | Avian | YRD |
| A/tree sparrow/Shanghai/01/2013     | G | 2013-05-09 | 508926 | 507149 | Avian | YRD |
| A/chicken/Guangdong/3640/2013       | G | 2013-05-16 | 576565 | 576571 | Avian | PRD |
| A/chicken/Guangdong/SD1/2013        | G | 2013-05-16 | 576569 | 576575 | Avian | PRD |
| A/chicken/Guangzhou/1/2013          | G | 2013-07-12 | 508781 | -      | Avian | PRD |
| A/Hebei/01/2013                     | G | 2013-07-19 | 509120 | 509122 | Human | OR  |
| A/Huizhou/01/2013                   | G | 2013-08-08 | 503499 | 503501 | Human | PRD |
| A/chicken/Shaoxing/2417/2013        | G | 2013-10-20 | 582340 | 582342 | Avian | YRD |
| A/chicken/Huzhou/3791/2013          | G | 2013-10-24 | 582354 | 582356 | Avian | OR  |
| A/chicken/Huzhou/3802/2013          | G | 2013-10-24 | 582361 | 582907 | Avian | OR  |
| A/chicken/Huzhou/4067/2013          | G | 2013-10-24 | 582944 | 582946 | Avian | OR  |
| A/chicken/Huzhou/4074/2013          | G | 2013-10-24 | 582966 | 582968 | Avian | OR  |
| A/chicken/Huzhou/4076/2013          | G | 2013-10-24 | 582983 | 582985 | Avian | OR  |
| A/silkie chicken/Huzhou/4213/2013   | G | 2013-10-24 | 583044 | 583046 | Avian | OR  |
| A/chicken/Jiaying/4490/2013         | G | 2013-10-25 | 583072 | 583074 | Avian | OR  |
| A/chicken/Shaoxing/5087/2013        | G | 2013-10-28 | 583095 | 583097 | Avian | YRD |
| A/chicken/Shaoxing/5201/2013        | G | 2013-10-28 | 583130 | 583132 | Avian | YRD |
| A/chicken/Shaoxing/5227/2013        | G | 2013-10-28 | 583144 | 583146 | Avian | YRD |
| A/silkie chicken/Shaoxing/5130/2013 | G | 2013-10-28 | 583102 | 583104 | Avian | YRD |
| A/silkie chicken/Shaoxing/5235/2013 | G | 2013-10-28 | 583151 | 583153 | Avian | YRD |
| A/chicken/Shaoxing/5479/2013        | G | 2013-10-29 | 583166 | 583168 | Avian | YRD |
| A/Guangdong/DG-02/2013              | G | 2013-11    | 515861 | 515860 | Human | PRD |
| A/Guangdong/24997/2013              | G | 2013-11-30 | 628520 | 628519 | Human | PRD |
| A/Guangdong/DG-03/2013              | G | 2013-12    | 515869 | 515868 | Human | PRD |
| A/Guangdong/YJ-04/2013              | G | 2013-12    | 515877 | 515876 | Human | PRD |
| A/Guangdong/YJ-05/2013              | G | 2013-12    | 515885 | 515884 | Human | PRD |
| A/chicken/Shenzhen/2293/2013        | G | 2013-12-13 | 581595 | 581597 | Avian | PRD |
| A/Guangdong/24999/2013              | G | 2013-12-16 | 628512 | 628511 | Human | PRD |
| A/chicken/Dongguan/3141/2013        | G | 2013-12-18 | 581622 | 581624 | Avian | PRD |
| A/chicken/Dongguan/3145/2013        | G | 2013-12-18 | 581629 | 581631 | Avian | PRD |
| A/silkie chicken/Dongguan/3049/2013 | G | 2013-12-18 | 581609 | 581611 | Avian | PRD |
| A/chicken/Dongguan/4040/2013        | G | 2013-12-19 | 583318 | 583320 | Avian | PRD |
| A/chicken/Dongguan/4064/2013        | G | 2013-12-19 | 583311 | 583313 | Avian | PRD |
| A/chicken/Dongguan/4251/2013        | G | 2013-12-19 | 582325 | 582327 | Avian | PRD |
| A/chicken/Shenzhen/3733/2013        | G | 2013-12-19 | 581844 | 581846 | Avian | PRD |
| A/chicken/Shenzhen/3734/2013        | G | 2013-12-19 | 581851 | 581853 | Avian | PRD |
| A/silkie chicken/Dongguan/3605/2013 | G | 2013-12-19 | 581832 | 581834 | Avian | PRD |
| A/silkie chicken/Dongguan/3606/2013 | G | 2013-12-19 | 581838 | 581840 | Avian | PRD |
| A/silkie chicken/Shenzhen/3781/2013 | G | 2013-12-19 | 581865 | 581867 | Avian | PRD |
| A/silkie chicken/Shenzhen/3782/2013 | G | 2013-12-19 | 581873 | 581875 | Avian | PRD |
| A/Shanghai/01/2014                  | G | 2014-01-03 | 531468 | 531470 | Human | YRD |



|                                     |   |            |          |          |       |     |
|-------------------------------------|---|------------|----------|----------|-------|-----|
| A/Guangdong/02620/2014              | G | 2014-01-08 | 628504   | 628503   | Human | PRD |
| A/chicken/China/028/2014            | G | 2014-01-10 | 703994   | 703996   | Avian | NA  |
| A/Guangdong/035/2014                | G | 2014-01-13 | 628472   | 628471   | Human | PRD |
| A/Hunan/08963/2014                  | G | 2014-02-02 | 628296   | 628295   | Human | OR  |
| A/Hunan/09193/2014                  | G | 2014-02-05 | 628184   | 628183   | Human | OR  |
| A/Anhui/09186/2014                  | G | 2014-02-07 | 628032   | 628031   | Human | YRD |
| A/Huaian/062/2014                   | N | 2014-02-14 | KP864455 | KP864449 | Human | YRD |
| A/chicken/Jiangxi/9534/2014         | G | 2014-02-16 | 583918   | 583920   | Avian | OR  |
| A/chicken/Jiangxi/10885/2014        | G | 2014-02-18 | 594185   | 594187   | Avian | OR  |
| A/chicken/Jiangxi/10896/2014        | G | 2014-02-18 | 594206   | 594208   | Avian | OR  |
| A/chicken/Jiangxi/10964/2014        | G | 2014-02-18 | 594346   | 594348   | Avian | OR  |
| A/chicken/Dongguan/864/2014         | G | 2014-02-20 | 597352   | 597354   | Avian | PRD |
| A/chicken/Dongguan/1124/2014        | G | 2014-02-21 | 597453   | 597455   | Avian | PRD |
| A/chicken/Dongguan/1177/2014        | G | 2014-02-21 | 596947   | 596949   | Avian | PRD |
| A/chicken/Dongguan/1307/2014        | G | 2014-02-21 | 597512   | 597514   | Avian | PRD |
| A/chicken/Dongguan/1314/2014        | G | 2014-02-21 | 597519   | 597521   | Avian | PRD |
| A/chicken/Dongguan/1382/2014        | G | 2014-02-21 | 597551   | 597553   | Avian | PRD |
| A/chicken/Dongguan/1421/2014        | G | 2014-02-21 | 597584   | 597586   | Avian | PRD |
| A/chicken/Dongguan/1533/2014        | G | 2014-02-21 | 578178   | 578180   | Avian | PRD |
| A/chicken/Dongguan/1697/2014        | G | 2014-02-21 | 578224   | 578226   | Avian | PRD |
| A/silkie chicken/Dongguan/1641/2014 | G | 2014-02-21 | 578192   | 578194   | Avian | PRD |
| A/Huaian/065/2014                   | N | 2014-02-24 | KP864457 | KP864458 | Human | YRD |
| A/Huaian/074/2014                   | N | 2014-03-02 | KP864459 | KP864446 | Human | YRD |
| A/chicken/Jiangxi/12200/2014        | G | 2014-03-16 | 592172   | 592174   | Avian | OR  |
| A/chicken/Jiangxi/12208/2014        | G | 2014-03-16 | 592333   | 592335   | Avian | OR  |
| A/chicken/Jiangxi/12219/2014        | G | 2014-03-16 | 592347   | 592349   | Avian | OR  |
| A/chicken/Jiangxi/12245/2014        | G | 2014-03-16 | 592059   | 592061   | Avian | OR  |
| A/chicken/Jiangxi/12249/2014        | G | 2014-03-16 | 592066   | 592068   | Avian | OR  |
| A/chicken/Jiangxi/12251/2014        | G | 2014-03-16 | 592396   | 592398   | Avian | OR  |
| A/chicken/Jiangxi/12261/2014        | G | 2014-03-16 | 592080   | 592082   | Avian | OR  |
| A/chicken/Jiangxi/12264/2014        | G | 2014-03-16 | 592418   | 592420   | Avian | OR  |
| A/Shantou/1002/2014                 | G | 2014-03-23 | 531777   | 531776   | Human | PRD |
| A/Shenzhen/SP126/2014               | G | 2014-03-23 | 592186   | 592188   | Human | PRD |
| A/Shenzhen/SP139/2014               | G | 2014-04-02 | 592193   | 592195   | Human | PRD |
| A/chicken/Jiangxi/13507/2014        | G | 2014-04-06 | 592476   | 592478   | Avian | OR  |
| A/chicken/Jiangxi/13524/2014        | G | 2014-04-06 | 592515   | 592517   | Avian | OR  |
| A/chicken/Jiangxi/13543/2014        | G | 2014-04-06 | 592577   | 592579   | Avian | OR  |
| A/chicken/Jiangxi/13548/2014        | G | 2014-04-06 | 592592   | 592594   | Avian | OR  |
| A/chicken/Jiangxi/13502/2014        | G | 2014-04-11 | 592230   | 592232   | Avian | OR  |
| A/chicken/Jiangxi/13510/2014        | G | 2014-04-11 | 592237   | 592239   | Avian | OR  |
| A/chicken/Jiangxi/13553/2014        | G | 2014-04-11 | 592288   | 592290   | Avian | OR  |
| A/Anhui/01881/2014                  | G | 2014-04-13 | 627417   | 627416   | Human | YRD |
| A/chicken/Jiangxi/14033/2014        | G | 2014-04-13 | 592639   | 592659   | Avian | OR  |
| A/Hunan/26938/2014                  | G | 2014-04-19 | 627856   | 627855   | Human | OR  |

|                                 |   |            |          |          |       |     |
|---------------------------------|---|------------|----------|----------|-------|-----|
| A/chicken/Jiangxi/14517/2014    | G | 2014-04-20 | 593160   | 593162   | Avian | OR  |
| A/chicken/Jiangxi/14518/2014    | G | 2014-04-20 | 593167   | 593169   | Avian | OR  |
| A/chicken/Jiangxi/15524/2014    | G | 2014-05-05 | 593278   | 593280   | Avian | OR  |
| A/Anhui/01887/2014              | G | 2014-05-20 | 627441   | 627440   | Human | YRD |
| A/Shandong/01/2014              | G | 2014-05-22 | 627808   | 627807   | Human | YRD |
| A/Huaian/083/2014               | N | 2014-05-27 | KP864443 | KP864441 | Human | YRD |
| A/chicken/Jiangxi/18008/2014    | G | 2014-06-07 | 593381   | 593383   | Avian | OR  |
| A/chicken/Jiangxi/18482/2014    | G | 2014-06-15 | 593469   | 593471   | Avian | OR  |
| A/chicken/Jiangxi/18487/2014    | G | 2014-06-15 | 593497   | 593499   | Avian | OR  |
| A/chicken/Jiangxi/18513/2014    | G | 2014-06-15 | 593541   | 593543   | Avian | OR  |
| A/chicken/Zhangzhou/8585/2014   | G | 2014-06-23 | 593645   | 593647   | Avian | OR  |
| A/chicken/Shantou/4325/2014     | G | 2014-07-01 | 593319   | 593321   | Avian | PRD |
| A/chicken/Shantou/4824/2014     | G | 2014-07-22 | 593341   | 593343   | Avian | PRD |
| A/Xinjiang/73030/2014           | G | 2014-07-25 | 627920   | 627919   | Human | OR  |
| A/Xinjiang/75802/2014           | G | 2014-08-15 | 627832   | 627831   | Human | OR  |
| A/XinjiangBintuan/99117/2014    | G | 2014-10-25 | 566100   | 566099   | Human | OR  |
| A/Chicken/Guangdong/DG478/2014  | G | 2014-11-25 | 580267   | 580269   | Avian | PRD |
| A/Xinjiang/98692/2014           | G | 2014-11-25 | 566116   | 566115   | Human | OR  |
| A/Zhejiang/17/2014              | G | 2014-11-25 | 552399   | 552401   | Human | YRD |
| A/Guangdong/02496/2014          | G | 2014-11-27 | 566092   | 566091   | Human | PRD |
| A/Chicken/Guangdong/DG479/2014  | G | 2014-11-30 | 580275   | 580277   | Avian | PRD |
| A/Duck/Guangdong/DG527/2014     | G | 2014-12-02 | 580283   | 580285   | Avian | PRD |
| A/Fujian/17/2014                | G | 2014-12-02 | 627481   | 627480   | Human | OR  |
| A/Guangdong/02497/2014          | G | 2014-12-03 | 627385   | 627384   | Human | PRD |
| A/Chicken/Guangdong/DG592/2014  | G | 2014-12-08 | 580291   | 580293   | Avian | PRD |
| A/Chicken/Guangdong/DG593/2014  | G | 2014-12-12 | 580299   | 580301   | Avian | PRD |
| A/Xinjiang/05916/2014           | G | 2014-12-25 | 566052   | 566051   | Human | OR  |
| A/Zhejiang/36/2014              | G | 2014-12-28 | 627129   | 627128   | Human | YRD |
| A/Fujian/22/2014                | G | 2014-12-29 | 627369   | 627368   | Human | OR  |
| A/Jiangsu/06307/2014            | G | 2014-12-29 | 566138   | 566137   | Human | YRD |
| A/chicken/Taizhou/TZJF02/2015   | G | 2015-01    | 682921   | 683026   | Avian | YRD |
| A/chicken/Wenzhou/HATSLG01/2015 | G | 2015-01    | 682923   | 683029   | Avian | YRD |
| A/chicken/Wenzhou/RAQL01/2015   | G | 2015-01    | 682918   | 683027   | Avian | YRD |
| A/chicken/Wenzhou/RAQL18/2015   | G | 2015-01    | 682919   | 683028   | Avian | YRD |
| A/chicken/Wenzhou/WZTSLG02/2015 | G | 2015-01    | 682924   | 683031   | Avian | YRD |
| A/duck/Wenzhou/RAQL10/2015      | G | 2015-01    | 682920   | 683025   | Avian | YRD |
| A/duck/Wenzhou/YJYF24/2015      | G | 2015-01    | 682922   | 683030   | Avian | YRD |
| A/Chicken/Guangdong/GZ068/2015  | G | 2015-01-01 | 580363   | 580365   | Avian | PRD |
| A/Chicken/Guangdong/HZ098/2015  | G | 2015-01-01 | 580313   | 580317   | Avian | PRD |
| A/Fujian/1/2015                 | G | 2015-01-01 | 627473   | 627472   | Human | OR  |
| A/Guangdong/15SF002/2015        | G | 2015-01-05 | 627209   | 627208   | Human | PRD |
| A/Duck/Guangdong/DG103/2015     | G | 2015-01-07 | 580327   | 580329   | Avian | PRD |
| A/Fujian/9/2015                 | G | 2015-01-13 | 627281   | 627280   | Human | OR  |
| A/Guangdong/15SF020/2015        | G | 2015-01-13 | 627193   | 627192   | Human | PRD |

|                                |   |            |          |          |       |     |
|--------------------------------|---|------------|----------|----------|-------|-----|
| A/Chicken/Guangdong/DG120/2015 | G | 2015-01-15 | 580347   | 580349   | Avian | PRD |
| A/Fujian/17/2015               | G | 2015-01-15 | 627105   | 627104   | Human | OR  |
| A/Jiangsu/22184/2015           | G | 2015-01-16 | 626985   | 626984   | Human | YRD |
| A/Chicken/Guangdong/CZ145/2015 | G | 2015-02-01 | 580371   | 580373   | Avian | PRD |
| A/Zhejiang/8/2015              | G | 2015-02-02 | 628768   | 628767   | Human | YRD |
| A/Huai/002/2015                | N | 2015-02-03 | KP864460 | KP864444 | Human | YRD |
| A/Guangdong/15SF053/2015       | G | 2015-02-04 | 627065   | 627064   | Human | PRD |
| A/Zhejiang/7/2015              | G | 2015-02-04 | 628776   | 628775   | Human | YRD |
| A/Chicken/Guangdong/SW153/2015 | G | 2015-02-05 | 580379   | 580381   | Avian | PRD |
| A/chicken/Huai/003/2015        | N | 2015-02-05 | KP864442 | KP864454 | Avian | YRD |
| A/Guangdong/15SF082/2015       | G | 2015-02-06 | 626993   | 626992   | Human | PRD |
| A/Chicken/Guangdong/SW154/2015 | G | 2015-02-10 | 580387   | 580389   | Avian | PRD |
| A/Guangdong/15SF080/2015       | G | 2015-02-10 | 627001   | 627000   | Human | PRD |
| A/Guangdong/15SF081/2015       | G | 2015-02-10 | 627049   | 627048   | Human | PRD |
| A/Hunan/19762/2015             | G | 2015-02-10 | 627081   | 627080   | Human | OR  |
| A/chicken/Quzhou/2/2015        | G | 2015-02-24 | 621115   | 621116   | Avian | YRD |
| A/Zhejiang/11/2015             | G | 2015-03-03 | 628816   | 628815   | Human | YRD |
| A/Anhui/33224/2015             | G | 2015-03-05 | 628744   | 628743   | Human | YRD |
| A/Shandong-Taian/01/2015       | G | 2015-03-07 | 628784   | 628783   | Human | YRD |
| A/Anhui/33228/2015             | G | 2015-04-08 | 628728   | 628727   | Human | YRD |
| A/Hubei/34007/2015             | G | 2015-04-22 | 628616   | 628615   | Human | OR  |
| A/Quzhou/2/2015                | G | 2015-04-23 | 621127   | 621128   | Human | YRD |
| A/Quzhou/1/2015                | G | 2015-04-25 | 621120   | 621121   | Human | YRD |
| A/Anhui/40094/2015             | G | 2015-05-23 | 628560   | 628559   | Human | YRD |
| A/Anhui/40095/2015             | G | 2015-05-23 | 628568   | 628567   | Human | YRD |
| A/Beijing/40610/2015           | G | 2015-05-26 | 628544   | 628543   | Human | OR  |
| A/Anhui/1-YK RG56/2013         | G | 2015-08-27 | 637063   | 637065   | Human | YRD |
| A/Fujian/1/2016                | G | 2016-01-13 | 833705   | 833707   | Human | OR  |
| A/Fujian/3/2016                | G | 2016-01-15 | 833714   | 833716   | Human | OR  |
| A/chicken/Ganzhou/GZ79/2016    | G | 2016-01-27 | 942085   | 942146   | Avian | OR  |
| A/chicken/Longquan/LQ78/2016   | G | 2016-01-30 | 942077   | 942138   | Avian | YRD |
| A/Zhejiang/6/2016              | G | 2016-10-07 | 887804   | 887803   | Human | YRD |
| A/Jiangsu/60467/2016           | G | 2016-10-26 | 887860   | 887859   | Human | YRD |
| A/Fujian/54840/2016            | G | 2016-11-16 | 888084   | 888083   | Human | OR  |
| A/Fujian/56600/2016            | G | 2016-11-20 | 887852   | 887851   | Human | OR  |
| A/Jiangsu/60466/2016           | G | 2016-11-21 | 887828   | 887827   | Human | YRD |
| A/Jiangsu/60456/2016           | G | 2016-12-02 | 887932   | 887931   | Human | YRD |
| A/Zhejiang/7/2016              | G | 2016-12-05 | 887708   | 887707   | Human | YRD |
| A/Jiangsu/60457/2016           | G | 2016-12-06 | 887924   | 887923   | Human | YRD |
| A/Jiangsu/60465/2016           | G | 2016-12-09 | 887868   | 887867   | Human | YRD |
| A/Jiangsu/60458/2016           | G | 2016-12-10 | 887916   | 887915   | Human | YRD |
| A/Jiangsu/60459/2016           | G | 2016-12-12 | 887908   | 887907   | Human | YRD |
| A/Guangdong/60061/2016         | G | 2016-12-13 | 887980   | 887979   | Human | PRD |
| A/Anhui/60928/2016             | G | 2016-12-15 | 888012   | 888011   | Human | YRD |

|                          |   |            |        |        |       |     |
|--------------------------|---|------------|--------|--------|-------|-----|
| A/Jiangsu/60462/2016     | G | 2016-12-16 | 887884 | 887883 | Human | YRD |
| A/Anhui/60927/2016       | G | 2016-12-18 | 887988 | 887987 | Human | YRD |
| A/Zhejiang/10/2016       | G | 2016-12-18 | 887780 | 887779 | Human | YRD |
| A/Anhui/60935/2016       | G | 2016-12-19 | 888060 | 888059 | Human | YRD |
| A/Jiangsu/60450/2016     | G | 2016-12-19 | 887964 | 887963 | Human | YRD |
| A/Jiangsu/60451/2016     | G | 2016-12-19 | 887956 | 887955 | Human | YRD |
| A/Jiangsu/60461/2016     | G | 2016-12-20 | 887892 | 887891 | Human | YRD |
| A/Anhui/60926/2016       | G | 2016-12-21 | 888076 | 888075 | Human | YRD |
| A/Zhejiang/15/2016       | G | 2016-12-21 | 887740 | 887739 | Human | YRD |
| A/Zhejiang/13/2016       | G | 2016-12-24 | 887756 | 887755 | Human | YRD |
| A/Zhejiang/12/2016       | G | 2016-12-25 | 887764 | 887763 | Human | YRD |
| A/Zhejiang/18/2016       | G | 2016-12-27 | 887692 | 887691 | Human | YRD |
| A/Guangdong/60923/2016   | G | 2016-12-28 | 887836 | 887835 | Human | PRD |
| A/Zhejiang/20/2016       | G | 2016-12-30 | 887668 | 887667 | Human | YRD |
| A/Zhejiang/17/2016       | G | 2016-12-31 | 887700 | 887699 | Human | YRD |
| A/Fujian/02151/2017      | G | 2017-01-01 | 887612 | 887611 | Human | OR  |
| A/Zhejiang/3/2017        | G | 2017-01-01 | 887812 | 887811 | Human | YRD |
| A/Zhejiang/5/2017        | G | 2017-01-02 | 887660 | 887659 | Human | YRD |
| A/Guangdong/17SF003/2016 | G | 2017-01-03 | 919607 | 919606 | Human | PRD |
| A/Zhejiang/2/2017        | G | 2017-01-04 | 887716 | 887715 | Human | YRD |
| A/Zhejiang/4/2017        | G | 2017-01-05 | 887684 | 887683 | Human | YRD |
| A/Zhejiang/6/2017        | G | 2017-01-05 | 887652 | 887651 | Human | YRD |
| A/Fujian/02152/2017      | G | 2017-01-06 | 887620 | 887619 | Human | OR  |
| A/Hunan/02286/2017       | G | 2017-01-06 | 887628 | 887627 | Human | OR  |
| A/Zhejiang/1/2017        | G | 2017-01-07 | 887724 | 887723 | Human | YRD |
| A/Hunan/02285/2017       | G | 2017-01-08 | 887644 | 887643 | Human | OR  |
| A/Hunan/02287/2017       | G | 2017-01-11 | 887636 | 887635 | Human | OR  |
| A/Guangdong/17SF006/2017 | G | 2017-01-12 | 919599 | 919598 | Human | PRD |
| A/Qingyuan/GIRD1/2017    | G | 2017-01-14 | 918736 | 918738 | Human | PRD |

**Note:** the accession number of the strains showed in this table were assigned by Global Initiative on Sharing All Influenza Data (GISAID) or National Center of Biology Information (NCBI). The first 3 characters “EPI” of all the accession number assigned by GISAID were omitted in the table. “-” indicate the sequence information was not available in both GISAID or NCBI, and the indicated sequences were not included in the phylogenetic trees calculation.

**Abbreviation:** “YRD” represent Yangtze River Delta, “PRD” represent Pearl River Delta and OR represent other regions. Letter “G” and “N” in the “Database” column represent “GISAID” and “NCBI”, respectively.

Supplementary Table S3. GISAID Influenza Data Acknowledgment

We acknowledge those who contributed to the generation of the genome sequences of influenza A (H7N9) viruses in GISAID, for which this research is based. The list is detailed below.

| Isolate name                   | Isolate ID     | Segments   | Country | Submitting/Originating Lab                  | Submitter   |
|--------------------------------|----------------|------------|---------|---------------------------------------------|-------------|
| A/Anhui/01876/2014             | EPI ISL 192326 | 8 segments | China   | WHO Chinese National Influenza Center       | Yang Lei    |
| A/Anhui/09186/2014             | EPI ISL 192405 | 8 segments | China   | WHO Chinese National Influenza Center       | Yang Lei    |
| A/Anhui/1-YK RG56/2013         | EPI ISL 194320 | 8 segments | China   | Other Database Import                       | EpiFluDB    |
| A/Anhui/60936/2016             | EPI ISL 242884 | 8 segments | China   | WHO Chinese National Influenza Center       | Yang Lei    |
| A/Beijing/40610/2015           | EPI ISL 192469 | 8 segments | China   | WHO Chinese National Influenza Center       | Yang Lei    |
| A/chicken/Dongguan/210/2014    | EPI ISL 176282 | 8 segments | China   | Other Database Import                       | EpiFluDB    |
| A/chicken/Dongguan/3438/2013   | EPI ISL 175674 | 8 segments | China   | Other Database Import                       | EpiFluDB    |
| A/chicken/Dongguan/3487/2013   | EPI ISL 175676 | 8 segments | China   | Other Database Import                       | EpiFluDB    |
| A/chicken/Dongguan/3491/2013   | EPI ISL 175678 | 8 segments | China   | Other Database Import                       | EpiFluDB    |
| A/chicken/Ganzhou/GZ79/2016    | EPI ISL 252837 | 8 segments | China   | Other Database Import                       | EpiFluDB    |
| A/Chicken/Guangdong/DG478/2014 | EPI ISL 176816 | 8 segments | China   | South China Agricultural University         | Weixin Jia  |
| A/Chicken/Guangdong/DG593/2014 | EPI ISL 176820 | 8 segments | China   | South China Agricultural University         | Weixin Jia  |
| A/chicken/Guangdong/G1/2013    | EPI ISL 175606 | 8 segments | China   | Other Database Import                       | EpiFluDB    |
| A/chicken/Guangdong/G2/2013    | EPI ISL 175607 | 8 segments | China   | Other Database Import                       | EpiFluDB    |
| A/chicken/Guangdong/G3/2013    | EPI ISL 175608 | 8 segments | China   | Other Database Import                       | EpiFluDB    |
| A/Chicken/Guangdong/SW153/2015 | EPI ISL 176836 | 8 segments | China   | South China Agricultural University         | Weixin Jia  |
| A/chicken/Jiangxi/10882/2014   | EPI ISL 176046 | 8 segments | China   | Other Database Import                       | EpiFluDB    |
| A/chicken/Jiangxi/14517/2014   | EPI ISL 180036 | 8 segments | China   | Other Database Import                       | EpiFluDB    |
| A/chicken/Jiangxi/18482/2014   | EPI ISL 180141 | 8 segments | China   | Other Database Import                       | EpiFluDB    |
| A/chicken/Jiangxi/9558/2014    | EPI ISL 176036 | 8 segments | China   | Other Database Import                       | EpiFluDB    |
| A/Chicken/Jilin/13188/2014     | EPI ISL 161671 | 8 segments | China   | WHO Chinese National Influenza Center       | Yang Lei    |
| A/chicken/Longquan/LQ78/2016   | EPI ISL 252829 | 8 segments | China   | Other Database Import                       | EpiFluDB    |
| A/chicken/Rizhao/515/2013      | EPI ISL 146183 | 8 segments | China   | Other Database Import                       | EpiFluDB    |
| A/chicken/Shanghai/S1078/2013  | EPI ISL 142925 | 8 segments | China   | Harbin Veterinary Research Institute (CAAS) | Kong Huihui |
| A/chicken/Shantou/2537/2014    | EPI ISL 180073 | 8 segments | China   | Other Database Import                       | EpiFluDB    |

|                                    |                |                     |       |                                                                                                        |              |
|------------------------------------|----------------|---------------------|-------|--------------------------------------------------------------------------------------------------------|--------------|
| A/chicken/Shenzhen/138/2014        | EPI ISL 176419 | 8 segments          | China | Other Database Import                                                                                  | EpiFluDB     |
| A/chicken/Shenzhen/1665/2013       | EPI ISL 175641 | 8 segments          | China | Other Database Import                                                                                  | EpiFluDB     |
| A/chicken/Wenzhou/WZTSLG02/2015    | EPI ISL 205128 | 8 segments          | China | Other Database Import                                                                                  | EpiFluDB     |
| A/chicken/Zhangzhou/8585/2014      | EPI ISL 180156 | 8 segments          | China | Other Database Import                                                                                  | EpiFluDB     |
| A/chicken/Zhejiang/DTID-ZJU06/2013 | EPI ISL 179671 | 8 segments          | China | Other Database Import                                                                                  | EpiFluDB     |
| A/Duck/Guangdong/DG103/2015        | EPI ISL 176828 | 8 segments          | China | South China Agricultural University                                                                    | Weixin Jia   |
| A/Fujian/02151/2017                | EPI ISL 242842 | 8 segments          | China | WHO Chinese National Influenza Center /<br>Fujian Provincial Center for Disease Control and Prevention | Yang Lei     |
| A/Fujian/1/2016                    | EPI ISL 233628 | 8 segments          | China | Fujian Center for Disease Control and Prevention                                                       | Jianfeng Xie |
| A/Fujian/2/2015                    | EPI ISL 192334 | 8 segments          | China | WHO Chinese National Influenza Center                                                                  | Yang Lei     |
| A/Fujian/21/2014                   | EPI ISL 192323 | 8 segments          | China | WHO Chinese National Influenza Center                                                                  | Yang Lei     |
| A/Fujian/54840/2016                | EPI ISL 242901 | 8 segments          | China | WHO Chinese National Influenza Center                                                                  | Yang Lei     |
| A/GD-120/2015/H7N9/2015-03-10      | EPI ISL 198750 | 8 segments          | China | Guangdong Provincial Center for Disease Control and Prevention                                         | Lu Jing      |
| A/GD-153/2014/H7N9/2014-05-08      | EPI ISL 198717 | 8 segments          | China | Guangdong Provincial Center for Disease Control and Prevention                                         | Lu Jing      |
| A/Guangdong/036/2014               | EPI ISL 192459 | 8 segments          | China | WHO Chinese National Influenza Center                                                                  | Yang Lei     |
| A/Guangdong/15SF043/2015           | EPI ISL 192290 | 8 segments          | China | WHO Chinese National Influenza Center                                                                  | Yang Lei     |
| A/Guangdong/17SF003/2016           | EPI ISL 249309 | 8 segments          | China | WHO Chinese National Influenza Center                                                                  | Yang Lei     |
| A/Guangdong/17SF006/2017           | EPI ISL 249308 | 8 segments          | China | WHO Chinese National Influenza Center                                                                  | Yang Lei     |
| A/Guangdong/2/2013                 | EPI ISL 153723 | 2 segments<br>(4,6) | China | Other Database Import                                                                                  | EpiFluDB     |
| A/Guangdong/24997/2013             | EPI ISL 192466 | 8 segments          | China | WHO Chinese National Influenza Center                                                                  | Yang Lei     |
| A/Guangdong/24999/2013             | EPI ISL 192465 | 8 segments          | China | WHO Chinese National Influenza Center                                                                  | Yang Lei     |
| A/Guangdong/HP001/2017             | EPI ISL 256108 | 8 segments          | China | Other Database Import                                                                                  | EpiFluDB     |
| A/Guangdong/SP440/2017             | EPI ISL 256109 | 8 segments          | China | Other Database Import                                                                                  | EpiFluDB     |
| A/Guangdong-Guangzhou/XN00457/2014 | EPI ISL 192370 | 8 segments          | China | WHO Chinese National Influenza Center                                                                  | Yang Lei     |
| A/Guangdong-Guangzhou/XN00588/2014 | EPI ISL 192358 | 8 segments          | China | WHO Chinese National Influenza Center                                                                  | Yang Lei     |
| A/Hebei/01/2013                    | EPI ISL 157293 | 8 segments          | China | WHO Chinese National Influenza Center                                                                  | Yang Lei     |
| A/Hubei/34007/2015                 | EPI ISL 192478 | 8 segments          | China | WHO Chinese National Influenza Center                                                                  | Yang Lei     |

|                                     |                |                               |       |                                                                                                                  |             |
|-------------------------------------|----------------|-------------------------------|-------|------------------------------------------------------------------------------------------------------------------|-------------|
| A/Huizhou/01/2013                   | EPI ISL 154827 | 8 segments                    | China | Other Database Import                                                                                            | EpiFluDB    |
| A/Hunan/02285/2017                  | EPI ISL 242846 | 8 segments                    | China | WHO Chinese National Influenza Center                                                                            | Yang Lei    |
| A/Hunan/26937/2014                  | EPI ISL 192382 | 8 segments                    | China | WHO Chinese National Influenza Center                                                                            | Yang Lei    |
| A/Jiangsu/03/2013                   | EPI ISL 141163 | 8 segments                    | China | WHO Chinese National Influenza Center                                                                            | Yang Lei    |
| A/Jiangsu/60456/2016                | EPI ISL 242882 | 8 segments                    | China | WHO Chinese National Influenza Center                                                                            | Yang Lei    |
| A/Jiangsu/60457/2016                | EPI ISL 242881 | 8 segments                    | China | WHO Chinese National Influenza Center                                                                            | Yang Lei    |
| A/Jiangsu/60466/2016                | EPI ISL 242869 | 8 segments                    | China | WHO Chinese National Influenza Center                                                                            | Yang Lei    |
| A/Nanchang/1/2013                   | EPI ISL 143556 | 8 segments                    | China | Other Database Import                                                                                            | EpiFluDB    |
| A/Nanjing/1/2013                    | EPI ISL 142305 | 8 segments                    | China | Other Database Import                                                                                            | EpiFluDB    |
| A/Nanjing/5/2013                    | EPI ISL 143664 | 8 segments                    | China | Jiangsu Provincial Center for Disease Control Prevention<br>Guangzhou Institute of Respiratory Diseases (GIRD) / | Cui Lunbiao |
| A/Qingyuan/GIRD1/2017               | EPI ISL 249102 | 8 segments                    | China | State Key Laboratory of Reipiratory Disease (Guangzhou Medical University)                                       | Guan Wenda  |
| A/Quzhou/1/2015                     | EPI ISL 190691 | 8 segments                    | China | Other Database Import                                                                                            | EpiFluDB    |
| A/Shanghai/1/2013                   | EPI ISL 138737 | 8 segments                    | China | WHO Chinese National Influenza Center                                                                            | Yang Lei    |
| A/Shanghai/Patient6/2013            | EPI ISL 142044 | 8 segments                    | China | Institute Pasteur of Shanghai CAS /<br>Shanghai public health clinical center                                    | Hao Pei     |
| A/silkie chicken/Dongguan/3606/2013 | EPI ISL 175710 | 8 segments                    | China | Other Database Import                                                                                            | EpiFluDB    |
| A/silkie chicken/Dongguan/656/2014  | EPI ISL 176186 | 7 segments<br>(1,2,3,4,5,6,7) | China | Other Database Import                                                                                            | EpiFluDB    |
| A/silkie chicken/Jiangxi/9476/2014  | EPI ISL 176033 | 8 segments                    | China | Other Database Import                                                                                            | EpiFluDB    |
| A/Xinjiang/73030/2014               | EPI ISL 192391 | 8 segments                    | China | WHO Chinese National Influenza Center                                                                            | Yang Lei    |
| A/Xinjiang/75802/2014               | EPI ISL 192380 | 8 segments                    | China | WHO Chinese National Influenza Center                                                                            | Yang Lei    |
| A/XinjiangBintuan/99117/2014        | EPI ISL 172824 | 8 segments                    | China | WHO Chinese National Influenza Center                                                                            | Yang Lei    |
| A/XinjiangBintuan/99118/2014        | EPI ISL 172825 | 8 segments                    | China | WHO Chinese National Influenza Center                                                                            | Yang Lei    |
| A/Zhejiang/1/2017                   | EPI ISL 242856 | 8 segments                    | China | WHO Chinese National Influenza Center /<br>Zhejiang Provincial Center for Disease Control and Prevention         | Yang Lei    |
| A/Zhejiang/19/2016                  | EPI ISL 242850 | 8 segments                    | China | WHO Chinese National Influenza Center /                                                                          | Yang Lei    |

|                                 |                |            |       |                                                                                                          |          |
|---------------------------------|----------------|------------|-------|----------------------------------------------------------------------------------------------------------|----------|
|                                 |                |            |       | Zhejiang Provincial Center for Disease Control and Prevention                                            |          |
| A/Zhejiang/22/2013              | EPI ISL 148728 | 8 segments | China | Zhejiang Provincial Center for Disease Control and Prevention                                            | Sun Yi   |
| A/Zhejiang/5/2017               | EPI ISL 242848 | 8 segments | China | WHO Chinese National Influenza Center /<br>Zhejiang Provincial Center for Disease Control and Prevention | Yang Lei |
| A/Zhejiang/6/2016               | EPI ISL 242866 | 8 segments | China | WHO Chinese National Influenza Center /<br>Zhejiang Provincial Center for Disease Control and Prevention | Yang Lei |
| A/Zhejiang/6/2017               | EPI ISL 242847 | 8 segments | China | WHO Chinese National Influenza Center /<br>Zhejiang Provincial Center for Disease Control and Prevention | Yang Lei |
| A/Zhejiang/8/2015               | EPI ISL 192497 | 8 segments | China | WHO Chinese National Influenza Center                                                                    | Yang Lei |
| A/Anhui/01881/2014              | EPI ISL 192328 | 8 segments | China | WHO Chinese National Influenza Center                                                                    | Yang Lei |
| A/Anhui/01887/2014              | EPI ISL 192331 | 8 segments | China | WHO Chinese National Influenza Center                                                                    | Yang Lei |
| A/Anhui/03/2013                 | EPI ISL 141191 | 8 segments | China | WHO Chinese National Influenza Center                                                                    | Yang Lei |
| A/Anhui/04/2013                 | EPI ISL 157287 | 8 segments | China | WHO Chinese National Influenza Center                                                                    | Yang Lei |
| A/Anhui/09186/2014              | EPI ISL 192405 | 8 segments | China | WHO Chinese National Influenza Center                                                                    | Yang Lei |
| A/Anhui/1-YK RG182/2013         | EPI ISL 194449 | 8 segments | China | Other Database Import                                                                                    | EpiFluDB |
| A/Anhui/1-YK RG56/2013          | EPI ISL 194320 | 8 segments | China | Other Database Import                                                                                    | EpiFluDB |
| A/Anhui/33224/2015              | EPI ISL 192494 | 8 segments | China | WHO Chinese National Influenza Center                                                                    | Yang Lei |
| A/Anhui/33228/2015              | EPI ISL 192492 | 8 segments | China | WHO Chinese National Influenza Center                                                                    | Yang Lei |
| A/Anhui/40094/2015              | EPI ISL 192471 | 8 segments | China | WHO Chinese National Influenza Center                                                                    | Yang Lei |
| A/Anhui/40095/2015              | EPI ISL 192472 | 8 segments | China | WHO Chinese National Influenza Center                                                                    | Yang Lei |
| A/Anhui/60926/2016              | EPI ISL 242900 | 8 segments | China | WHO Chinese National Influenza Center                                                                    | Yang Lei |
| A/Anhui/60927/2016              | EPI ISL 242889 | 8 segments | China | WHO Chinese National Influenza Center                                                                    | Yang Lei |
| A/Anhui/60928/2016              | EPI ISL 242892 | 8 segments | China | WHO Chinese National Influenza Center                                                                    | Yang Lei |
| A/Anhui/60935/2016              | EPI ISL 242898 | 8 segments | China | WHO Chinese National Influenza Center                                                                    | Yang Lei |
| A/Beijing/40610/2015            | EPI ISL 192469 | 8 segments | China | WHO Chinese National Influenza Center                                                                    | Yang Lei |
| A/chicken/Anhui-Chuzhou/01/2013 | EPI ISL 141161 | 8 segments | China | WHO Chinese National Influenza Center                                                                    | Yang Lei |
| A/chicken/China/028/2014        | EPI ISL 208998 | 8 segments | China | Other Database Import                                                                                    | EpiFluDB |
| A/chicken/Dongguan/1124/2014    | EPI ISL 176359 | 8 segments | China | Other Database Import                                                                                    | EpiFluDB |



|                                |                |            |       |                                             |               |
|--------------------------------|----------------|------------|-------|---------------------------------------------|---------------|
| A/chicken/Dongguan/1177/2014   | EPI ISL 176201 | 8 segments | China | Other Database Import                       | EpiFluDB      |
| A/chicken/Dongguan/1307/2014   | EPI ISL 176366 | 8 segments | China | Other Database Import                       | EpiFluDB      |
| A/chicken/Dongguan/1314/2014   | EPI ISL 176367 | 8 segments | China | Other Database Import                       | EpiFluDB      |
| A/chicken/Dongguan/1382/2014   | EPI ISL 176371 | 8 segments | China | Other Database Import                       | EpiFluDB      |
| A/chicken/Dongguan/1421/2014   | EPI ISL 176374 | 8 segments | China | Other Database Import                       | EpiFluDB      |
| A/chicken/Dongguan/1533/2014   | EPI ISL 176409 | 8 segments | China | Other Database Import                       | EpiFluDB      |
| A/chicken/Dongguan/1697/2014   | EPI ISL 176415 | 8 segments | China | Other Database Import                       | EpiFluDB      |
| A/chicken/Dongguan/3141/2013   | EPI ISL 175651 | 8 segments | China | Other Database Import                       | EpiFluDB      |
| A/chicken/Dongguan/3145/2013   | EPI ISL 175652 | 8 segments | China | Other Database Import                       | EpiFluDB      |
| A/chicken/Dongguan/4040/2013   | EPI ISL 175866 | 8 segments | China | Other Database Import                       | EpiFluDB      |
| A/chicken/Dongguan/4064/2013   | EPI ISL 175842 | 8 segments | China | Other Database Import                       | EpiFluDB      |
| A/chicken/Dongguan/4251/2013   | EPI ISL 175734 | 8 segments | China | Other Database Import                       | EpiFluDB      |
| A/chicken/Dongguan/864/2014    | EPI ISL 176304 | 8 segments | China | Other Database Import                       | EpiFluDB      |
| A/chicken/Ganzhou/GZ79/2016    | EPI ISL 252837 | 8 segments | China | Other Database Import                       | EpiFluDB      |
| A/chicken/Guangdong/3640/2013  | EPI ISL 175605 | 8 segments | China | Other Database Import                       | EpiFluDB      |
| A/Chicken/Guangdong/CZ145/2015 | EPI ISL 176835 | 8 segments | China | South China Agricultural University         | Weixin Jia    |
| A/Chicken/Guangdong/DG120/2015 | EPI ISL 176832 | 8 segments | China | South China Agricultural University         | Weixin Jia    |
| A/Chicken/Guangdong/DG478/2014 | EPI ISL 176816 | 8 segments | China | South China Agricultural University         | Weixin Jia    |
| A/Chicken/Guangdong/DG478/2014 | EPI ISL 176816 | 8 segments | China | South China Agricultural University         | Weixin Jia(2) |
| A/Chicken/Guangdong/DG479/2014 | EPI ISL 176817 | 8 segments | China | South China Agricultural University         | Weixin Jia    |
| A/Chicken/Guangdong/DG592/2014 | EPI ISL 176819 | 8 segments | China | South China Agricultural University         | Weixin Jia    |
| A/Chicken/Guangdong/DG593/2014 | EPI ISL 176820 | 8 segments | China | South China Agricultural University         | Weixin Jia    |
| A/chicken/Guangdong/G1/2013    | EPI ISL 175606 | 8 segments | China | Other Database Import                       | EpiFluDB      |
| A/chicken/Guangdong/G3/2013    | EPI ISL 175608 | 8 segments | China | Other Database Import                       | EpiFluDB      |
| A/Chicken/Guangdong/GZ068/2015 | EPI ISL 176834 | 8 segments | China | South China Agricultural University         | Weixin Jia    |
| A/Chicken/Guangdong/HZ098/2015 | EPI ISL 176824 | 8 segments | China | South China Agricultural University         | Weixin Jia    |
| A/chicken/Guangdong/SD1/2013   | EPI ISL 175609 | 8 segments | China | Other Database Import                       | EpiFluDB      |
| A/chicken/Guangdong/SD641/2013 | EPI ISL 142934 | 8 segments | China | Harbin Veterinary Research Institute (CAAS) | Kong Huihui   |

|                                |                |                |       |                                             |             |
|--------------------------------|----------------|----------------|-------|---------------------------------------------|-------------|
| A/Chicken/Guangdong/SW153/2015 | EPI ISL 176836 | 8 segments     | China | South China Agricultural University         | Weixin Jia  |
| A/Chicken/Guangdong/SW154/2015 | EPI ISL 176837 | 8 segments     | China | South China Agricultural University         | Weixin Jia  |
| A/chicken/Guangzhou/1/2013     | EPI ISL 157153 | 1 segments (4) | China | Other Database Import                       | EpiFluDB    |
| A/chicken/Hangzhou/174/2013    | EPI ISL 194993 | 8 segments     | China | Other Database Import                       | EpiFluDB    |
| A/chicken/Henan/102/2013       | EPI ISL 206699 | 8 segments     | China | Other Database Import                       | EpiFluDB    |
| A/chicken/Henan/115/2013       | EPI ISL 206706 | 8 segments     | China | Other Database Import                       | EpiFluDB    |
| A/chicken/Henan/120/2013       | EPI ISL 206708 | 8 segments     | China | Other Database Import                       | EpiFluDB    |
| A/chicken/Henan/141/2013       | EPI ISL 206709 | 8 segments     | China | Other Database Import                       | EpiFluDB    |
| A/chicken/Huzhou/3791/2013     | EPI ISL 175738 | 8 segments     | China | Other Database Import                       | EpiFluDB    |
| A/chicken/Huzhou/3802/2013     | EPI ISL 175739 | 8 segments     | China | Other Database Import                       | EpiFluDB    |
| A/chicken/Huzhou/4067/2013     | EPI ISL 175769 | 8 segments     | China | Other Database Import                       | EpiFluDB    |
| A/chicken/Huzhou/4074/2013     | EPI ISL 175772 | 8 segments     | China | Other Database Import                       | EpiFluDB    |
| A/chicken/Huzhou/4076/2013     | EPI ISL 175773 | 8 segments     | China | Other Database Import                       | EpiFluDB    |
| A/chicken/Jiangsu/1021/2013    | EPI ISL 153841 | 8 segments     | China | Other Database Import                       | EpiFluDB    |
| A/chicken/Jiangsu/SC035/2013   | EPI ISL 142932 | 8 segments     | China | Harbin Veterinary Research Institute (CAAS) | Kong Huihui |
| A/chicken/Jiangsu/SC537/2013   | EPI ISL 142930 | 8 segments     | China | Harbin Veterinary Research Institute (CAAS) | Kong Huihui |
| A/chicken/Jiangxi/10885/2014   | EPI ISL 176047 | 8 segments     | China | Other Database Import                       | EpiFluDB    |
| A/chicken/Jiangxi/10896/2014   | EPI ISL 176050 | 8 segments     | China | Other Database Import                       | EpiFluDB    |
| A/chicken/Jiangxi/10964/2014   | EPI ISL 176131 | 8 segments     | China | Other Database Import                       | EpiFluDB    |
| A/chicken/Jiangxi/12200/2014   | EPI ISL 179904 | 8 segments     | China | Other Database Import                       | EpiFluDB    |
| A/chicken/Jiangxi/12208/2014   | EPI ISL 179960 | 8 segments     | China | Other Database Import                       | EpiFluDB    |
| A/chicken/Jiangxi/12219/2014   | EPI ISL 179961 | 8 segments     | China | Other Database Import                       | EpiFluDB    |
| A/chicken/Jiangxi/12245/2014   | EPI ISL 179856 | 8 segments     | China | Other Database Import                       | EpiFluDB    |
| A/chicken/Jiangxi/12249/2014   | EPI ISL 179854 | 8 segments     | China | Other Database Import                       | EpiFluDB    |
| A/chicken/Jiangxi/12251/2014   | EPI ISL 179968 | 8 segments     | China | Other Database Import                       | EpiFluDB    |
| A/chicken/Jiangxi/12261/2014   | EPI ISL 179859 | 8 segments     | China | Other Database Import                       | EpiFluDB    |
| A/chicken/Jiangxi/12264/2014   | EPI ISL 179971 | 8 segments     | China | Other Database Import                       | EpiFluDB    |
| A/chicken/Jiangxi/12544/2013   | EPI ISL 175827 | 8 segments     | China | Other Database Import                       | EpiFluDB    |

|                              |                |            |       |                                                    |             |
|------------------------------|----------------|------------|-------|----------------------------------------------------|-------------|
| A/chicken/Jiangxi/12564/2013 | EPI ISL 179799 | 8 segments | China | Other Database Import                              | EpiFluDB    |
| A/chicken/Jiangxi/13502/2014 | EPI ISL 179912 | 8 segments | China | Other Database Import                              | EpiFluDB    |
| A/chicken/Jiangxi/13507/2014 | EPI ISL 179979 | 8 segments | China | Other Database Import                              | EpiFluDB    |
| A/chicken/Jiangxi/13510/2014 | EPI ISL 179917 | 8 segments | China | Other Database Import                              | EpiFluDB    |
| A/chicken/Jiangxi/13524/2014 | EPI ISL 179984 | 8 segments | China | Other Database Import                              | EpiFluDB    |
| A/chicken/Jiangxi/13543/2014 | EPI ISL 180020 | 8 segments | China | Other Database Import                              | EpiFluDB    |
| A/chicken/Jiangxi/13548/2014 | EPI ISL 180022 | 8 segments | China | Other Database Import                              | EpiFluDB    |
| A/chicken/Jiangxi/13553/2014 | EPI ISL 179920 | 8 segments | China | Other Database Import                              | EpiFluDB    |
| A/chicken/Jiangxi/14033/2014 | EPI ISL 180028 | 8 segments | China | Other Database Import                              | EpiFluDB    |
| A/chicken/Jiangxi/14517/2014 | EPI ISL 180036 | 8 segments | China | Other Database Import                              | EpiFluDB    |
| A/chicken/Jiangxi/14518/2014 | EPI ISL 180037 | 8 segments | China | Other Database Import                              | EpiFluDB    |
| A/chicken/Jiangxi/15524/2014 | EPI ISL 180085 | 8 segments | China | Other Database Import                              | EpiFluDB    |
| A/chicken/Jiangxi/18008/2014 | EPI ISL 180100 | 8 segments | China | Other Database Import                              | EpiFluDB    |
| A/chicken/Jiangxi/18482/2014 | EPI ISL 180141 | 8 segments | China | Other Database Import                              | EpiFluDB    |
| A/chicken/Jiangxi/18487/2014 | EPI ISL 180145 | 8 segments | China | Other Database Import                              | EpiFluDB    |
| A/chicken/Jiangxi/18513/2014 | EPI ISL 180148 | 8 segments | China | Other Database Import                              | EpiFluDB    |
| A/chicken/Jiangxi/9534/2014  | EPI ISL 176035 | 8 segments | China | Other Database Import                              | EpiFluDB    |
| A/chicken/Jiangxi/SD001/2013 | EPI ISL 142929 | 8 segments | China | Harbin Veterinary Research Institute (CAAS)        | Kong Huihui |
| A/chicken/Jiaxing/4490/2013  | EPI ISL 175784 | 8 segments | China | Other Database Import                              | EpiFluDB    |
| A/chicken/Longquan/LQ78/2016 | EPI ISL 252829 | 8 segments | China | Other Database Import                              | EpiFluDB    |
| A/Chicken/Nanjing/761/2013   | EPI ISL 159062 | 8 segments | China | Beijing Institute of Microbiology and Epidemiology | Fan Hang    |
| A/chicken/Quzhou/2/2015      | EPI ISL 190693 | 8 segments | China | Other Database Import                              | EpiFluDB    |
| A/chicken/Shantou/4325/2014  | EPI ISL 180093 | 8 segments | China | Other Database Import                              | EpiFluDB    |
| A/chicken/Shantou/4824/2014  | EPI ISL 180094 | 8 segments | China | Other Database Import                              | EpiFluDB    |
| A/chicken/Shaoxing/2417/2013 | EPI ISL 175736 | 8 segments | China | Other Database Import                              | EpiFluDB    |
| A/chicken/Shaoxing/5087/2013 | EPI ISL 175788 | 8 segments | China | Other Database Import                              | EpiFluDB    |
| A/chicken/Shaoxing/5201/2013 | EPI ISL 175817 | 8 segments | China | Other Database Import                              | EpiFluDB    |
| A/chicken/Shaoxing/5227/2013 | EPI ISL 175819 | 8 segments | China | Other Database Import                              | EpiFluDB    |

|                                    |                |            |       |                                                                                                        |              |
|------------------------------------|----------------|------------|-------|--------------------------------------------------------------------------------------------------------|--------------|
| A/chicken/Shaoxing/5479/2013       | EPI ISL 175822 | 8 segments | China | Other Database Import                                                                                  | EpiFluDB     |
| A/chicken/Shenzhen/2293/2013       | EPI ISL 175647 | 8 segments | China | Other Database Import                                                                                  | EpiFluDB     |
| A/chicken/Shenzhen/3733/2013       | EPI ISL 175711 | 8 segments | China | Other Database Import                                                                                  | EpiFluDB     |
| A/chicken/Shenzhen/3734/2013       | EPI ISL 175712 | 8 segments | China | Other Database Import                                                                                  | EpiFluDB     |
| A/chicken/Taizhou/TZJF02/2015      | EPI ISL 205125 | 8 segments | China | Other Database Import                                                                                  | EpiFluDB     |
| A/chicken/Wenzhou/HATSLG01/2015    | EPI ISL 205127 | 8 segments | China | Other Database Import                                                                                  | EpiFluDB     |
| A/chicken/Wenzhou/RAQL01/2015      | EPI ISL 205122 | 8 segments | China | Other Database Import                                                                                  | EpiFluDB     |
| A/chicken/Wenzhou/RAQL18/2015      | EPI ISL 205123 | 8 segments | China | Other Database Import                                                                                  | EpiFluDB     |
| A/chicken/Wenzhou/WZTSLG02/2015    | EPI ISL 205128 | 8 segments | China | Other Database Import                                                                                  | EpiFluDB     |
| A/chicken/Wuxi/0405005/2013        | EPI ISL 200115 | 8 segments | China | Other Database Import                                                                                  | EpiFluDB     |
| A/chicken/Zhangzhou/8585/2014      | EPI ISL 180156 | 8 segments | China | Other Database Import                                                                                  | EpiFluDB     |
| A/chicken/Zhejiang/C483/2013       | EPI ISL 162867 | 8 segments | China | Other Database Import                                                                                  | EpiFluDB     |
| A/chicken/Zhejiang/DTID-ZJU01/2013 | EPI ISL 139501 | 8 segments | China | Other Database Import                                                                                  | EpiFluDB     |
| A/chicken/Zhejiang/SD007/2013      | EPI ISL 142919 | 8 segments | China | Harbin Veterinary Research Institute (CAAS)                                                            | Kong Huihui  |
| A/Duck/Guangdong/DG103/2015        | EPI ISL 176828 | 8 segments | China | South China Agricultural University                                                                    | Weixin Jia   |
| A/Duck/Guangdong/DG527/2014        | EPI ISL 176818 | 8 segments | China | South China Agricultural University                                                                    | Weixin Jia   |
| A/duck/Wenzhou/RAQL10/2015         | EPI ISL 205124 | 8 segments | China | Other Database Import                                                                                  | EpiFluDB     |
| A/duck/Wenzhou/YJYF24/2015         | EPI ISL 205126 | 8 segments | China | Other Database Import                                                                                  | EpiFluDB     |
| A/Fujian/02/2013                   | EPI ISL 157288 | 8 segments | China | WHO Chinese National Influenza Center                                                                  | Yang Lei     |
| A/Fujian/02151/2017                | EPI ISL 242842 | 8 segments | China | WHO Chinese National Influenza Center /<br>Fujian Provincial Center for Disease Control and Prevention | Yang Lei     |
| A/Fujian/02152/2017                | EPI ISL 242843 | 8 segments | China | WHO Chinese National Influenza Center /<br>Fujian Provincial Center for Disease Control and Prevention | Yang Lei     |
| A/Fujian/03/2013                   | EPI ISL 157289 | 8 segments | China | WHO Chinese National Influenza Center                                                                  | Yang Lei     |
| A/Fujian/04/2013                   | EPI ISL 157290 | 8 segments | China | WHO Chinese National Influenza Center                                                                  | Yang Lei     |
| A/Fujian/05/2013                   | EPI ISL 157292 | 8 segments | China | WHO Chinese National Influenza Center                                                                  | Yang Lei     |
| A/Fujian/1/2015                    | EPI ISL 192335 | 8 segments | China | WHO Chinese National Influenza Center                                                                  | Yang Lei     |
| A/Fujian/1/2016                    | EPI ISL 233628 | 8 segments | China | Fujian Center for Disease Control and Prevention                                                       | Jianfeng Xie |

|                          |                |            |       |                                                                                                        |              |
|--------------------------|----------------|------------|-------|--------------------------------------------------------------------------------------------------------|--------------|
| A/Fujian/17/2014         | EPI ISL 192336 | 8 segments | China | WHO Chinese National Influenza Center                                                                  | Yang Lei     |
| A/Fujian/17/2015         | EPI ISL 192289 | 8 segments | China | WHO Chinese National Influenza Center                                                                  | Yang Lei     |
| A/Fujian/22/2014         | EPI ISL 192322 | 8 segments | China | WHO Chinese National Influenza Center                                                                  | Yang Lei     |
| A/Fujian/3/2016          | EPI ISL 233629 | 8 segments | China | Fujian Center for Disease Control and Prevention                                                       | Jianfeng Xie |
| A/Fujian/54840/2016      | EPI ISL 242901 | 8 segments | China | WHO Chinese National Influenza Center                                                                  | Yang Lei     |
| A/Fujian/56600/2016      | EPI ISL 242872 | 8 segments | China | WHO Chinese National Influenza Center /Fujian Provincial Center for Disease Control and Prevention     | Yang Lei     |
| A/Fujian/9/2015          | EPI ISL 192311 | 8 segments | China | WHO Chinese National Influenza Center                                                                  | Yang Lei     |
| A/Guangdong/02496/2014   | EPI ISL 172823 | 8 segments | China | WHO Chinese National Influenza Center                                                                  | Yang Lei     |
| A/Guangdong/02497/2014   | EPI ISL 192324 | 8 segments | China | WHO Chinese National Influenza Center                                                                  | Yang Lei     |
| A/Guangdong/02620/2014   | EPI ISL 192464 | 8 segments | China | WHO Chinese National Influenza Center                                                                  | Yang Lei     |
| A/Guangdong/035/2014     | EPI ISL 192460 | 8 segments | China | WHO Chinese National Influenza Center                                                                  | Yang Lei     |
| A/Guangdong/15SF002/2015 | EPI ISL 192302 | 8 segments | China | WHO Chinese National Influenza Center                                                                  | Yang Lei     |
| A/Guangdong/15SF020/2015 | EPI ISL 192300 | 8 segments | China | WHO Chinese National Influenza Center                                                                  | Yang Lei     |
| A/Guangdong/15SF053/2015 | EPI ISL 192284 | 8 segments | China | WHO Chinese National Influenza Center                                                                  | Yang Lei     |
| A/Guangdong/15SF080/2015 | EPI ISL 192276 | 8 segments | China | WHO Chinese National Influenza Center                                                                  | Yang Lei     |
| A/Guangdong/15SF081/2015 | EPI ISL 192282 | 8 segments | China | WHO Chinese National Influenza Center                                                                  | Yang Lei     |
| A/Guangdong/15SF082/2015 | EPI ISL 192275 | 8 segments | China | WHO Chinese National Influenza Center                                                                  | Yang Lei     |
| A/Guangdong/17SF003/2016 | EPI ISL 249309 | 8 segments | China | WHO Chinese National Influenza Center                                                                  | Yang Lei     |
| A/Guangdong/17SF006/2017 | EPI ISL 249308 | 8 segments | China | WHO Chinese National Influenza Center                                                                  | Yang Lei     |
| A/Guangdong/24997/2013   | EPI ISL 192466 | 8 segments | China | WHO Chinese National Influenza Center                                                                  | Yang Lei     |
| A/Guangdong/24999/2013   | EPI ISL 192465 | 8 segments | China | WHO Chinese National Influenza Center                                                                  | Yang Lei     |
| A/Guangdong/60061/2016   | EPI ISL 242888 | 8 segments | China | WHO Chinese National Influenza Center / Guangdong Provincial Center for Disease Control and Prevention | Yang Lei     |
| A/Guangdong/60923/2016   | EPI ISL 242870 | 8 segments | China | WHO Chinese National Influenza Center / Guangdong Provincial Center for Disease Control and Prevention | Yang Lei     |
| A/Guangdong/DG-02/2013   | EPI ISL 159070 | 8 segments | China | Guangdong Provincial Center for Disease Control and Prevention                                         | Lu Jing      |
| A/Guangdong/DG-03/2013   | EPI ISL 159071 | 8 segments | China | Guangdong Provincial Center for Disease Control and Prevention                                         | Lu Jing      |

|                        |                |            |       |                                                                |            |
|------------------------|----------------|------------|-------|----------------------------------------------------------------|------------|
| A/Guangdong/YJ-04/2013 | EPI ISL 159072 | 8 segments | China | Guangdong Provincial Center for Disease Control and Prevention | Lu Jing    |
| A/Guangdong/YJ-05/2013 | EPI ISL 159073 | 8 segments | China | Guangdong Provincial Center for Disease Control and Prevention | Lu Jing    |
| A/Hangzhou/254/2013    | EPI ISL 141775 | 8 segments | China | Hangzhou Center for Disease Control and Prevention             | Li Jun     |
| A/Hebei/01/2013        | EPI ISL 157293 | 8 segments | China | WHO Chinese National Influenza Center                          | Yang Lei   |
| A/Hubei/34007/2015     | EPI ISL 192478 | 8 segments | China | WHO Chinese National Influenza Center                          | Yang Lei   |
| A/Huizhou/01/2013      | EPI ISL 154827 | 8 segments | China | Other Database Import                                          | EpiFluDB   |
| A/Hunan/02285/2017     | EPI ISL 242846 | 8 segments | China | WHO Chinese National Influenza Center                          | Yang Lei   |
| A/Hunan/02286/2017     | EPI ISL 242844 | 8 segments | China | WHO Chinese National Influenza Center                          | Yang Lei   |
| A/Hunan/02287/2017     | EPI ISL 242845 | 8 segments | China | WHO Chinese National Influenza Center                          | Yang Lei   |
| A/Hunan/08963/2014     | EPI ISL 192438 | 8 segments | China | WHO Chinese National Influenza Center                          | Yang Lei   |
| A/Hunan/09193/2014     | EPI ISL 192424 | 8 segments | China | WHO Chinese National Influenza Center                          | Yang Lei   |
| A/Hunan/19762/2015     | EPI ISL 192286 | 8 segments | China | WHO Chinese National Influenza Center                          | Yang Lei   |
| A/Hunan/26938/2014     | EPI ISL 192383 | 8 segments | China | WHO Chinese National Influenza Center                          | Yang Lei   |
| A/Jiangsu/06307/2014   | EPI ISL 172829 | 8 segments | China | WHO Chinese National Influenza Center                          | Yang Lei   |
| A/Jiangsu/22184/2015   | EPI ISL 192274 | 8 segments | China | WHO Chinese National Influenza Center                          | Yang Lei   |
| A/Jiangsu/60450/2016   | EPI ISL 242886 | 8 segments | China | WHO Chinese National Influenza Center                          | Yang Lei   |
| A/Jiangsu/60451/2016   | EPI ISL 242885 | 8 segments | China | WHO Chinese National Influenza Center                          | Yang Lei   |
| A/Jiangsu/60456/2016   | EPI ISL 242882 | 8 segments | China | WHO Chinese National Influenza Center                          | Yang Lei   |
| A/Jiangsu/60457/2016   | EPI ISL 242881 | 8 segments | China | WHO Chinese National Influenza Center                          | Yang Lei   |
| A/Jiangsu/60458/2016   | EPI ISL 242880 | 8 segments | China | WHO Chinese National Influenza Center                          | Yang Lei   |
| A/Jiangsu/60459/2016   | EPI ISL 242879 | 8 segments | China | WHO Chinese National Influenza Center                          | Yang Lei   |
| A/Jiangsu/60461/2016   | EPI ISL 242877 | 8 segments | China | WHO Chinese National Influenza Center                          | Yang Lei   |
| A/Jiangsu/60462/2016   | EPI ISL 242876 | 8 segments | China | WHO Chinese National Influenza Center                          | Yang Lei   |
| A/Jiangsu/60465/2016   | EPI ISL 242874 | 8 segments | China | WHO Chinese National Influenza Center                          | Yang Lei   |
| A/Jiangsu/60466/2016   | EPI ISL 242869 | 8 segments | China | WHO Chinese National Influenza Center                          | Yang Lei   |
| A/Jiangsu/60467/2016   | EPI ISL 242873 | 8 segments | China | WHO Chinese National Influenza Center                          | Yang Lei   |
| A/Jiangsu/Wuxi04/2013  | EPI ISL 220945 | 8 segments | China | Beijing Institute of Microbiology and Epidemiology             | Ma Maijuan |
| A/Minhang/S01/2013     | EPI ISL 252548 | 8 segments | China | Other Database Import                                          | EpiFluDB   |

|                                     |                |            |       |                                                                                                                                |                |
|-------------------------------------|----------------|------------|-------|--------------------------------------------------------------------------------------------------------------------------------|----------------|
| A/Nanjing/6/2013                    | EPI ISL 153011 | 8 segments | China | Other Database Import                                                                                                          | EpiFluDB       |
| A/Nanjing/7/2013                    | EPI ISL 153013 | 8 segments | China | Other Database Import                                                                                                          | EpiFluDB       |
| A/pigeon/Shanghai/S1421/2013        | EPI ISL 142903 | 8 segments | China | Harbin Veterinary Research Institute (CAAS)                                                                                    | Kong Huihui    |
| A/Qingyuan/GIRD1/2017               | EPI ISL 249102 | 8 segments | China | Guangzhou Institute of Respiratory Diseases (GIRD) /State Key Laboratory of Reipiratory Disease (Guangzhou Medical University) | Guan Wenda     |
| A/Quzhou/1/2015                     | EPI ISL 190691 | 8 segments | China | Other Database Import                                                                                                          | EpiFluDB       |
| A/Quzhou/2/2015                     | EPI ISL 190692 | 8 segments | China | Other Database Import                                                                                                          | EpiFluDB       |
| A/Shandong/01/2014                  | EPI ISL 192377 | 8 segments | China | WHO Chinese National Influenza Center                                                                                          | Yang Lei       |
| A/Shandong-Taian/01/2015            | EPI ISL 192499 | 8 segments | China | WHO Chinese National Influenza Center                                                                                          | Yang Lei       |
| A/Shanghai/01/2014                  | EPI ISL 162470 | 8 segments | China | Other Database Import                                                                                                          | EpiFluDB       |
| A/Shanghai/02/2013                  | EPI ISL 141437 | 8 segments | China | Other Database Import                                                                                                          | EpiFluDB       |
| A/Shanghai/1/2013                   | EPI ISL 138737 | 8 segments | China | WHO Chinese National Influenza Center                                                                                          | Yang Lei       |
| A/Shanghai/3/2013                   | EPI ISL 139649 | 8 segments | China | WHO Chinese National Influenza Center                                                                                          | Yang Lei       |
| A/Shanghai/4664T/2013               | EPI ISL 140924 | 8 segments | China | Other Database Import                                                                                                          | EpiFluDB       |
| A/Shanghai/ION/2013                 | EPI ISL 177875 | 8 segments | China | Other Database Import                                                                                                          | EpiFluDB       |
| A/Shanghai/MH01/2013                | EPI ISL 166490 | 8 segments | China | Other Database Import                                                                                                          | EpiFluDB       |
| A/Shantou/1002/2014                 | EPI ISL 162619 | 8 segments | China | Shantou University Medical College                                                                                             | Farooqui Amber |
| A/Shenzhen/SP126/2014               | EPI ISL 179907 | 8 segments | China | Other Database Import                                                                                                          | EpiFluDB       |
| A/Shenzhen/SP139/2014               | EPI ISL 179906 | 8 segments | China | Other Database Import                                                                                                          | EpiFluDB       |
| A/silkie chicken/Dongguan/1641/2014 | EPI ISL 176411 | 8 segments | China | Other Database Import                                                                                                          | EpiFluDB       |
| A/silkie chicken/Dongguan/3049/2013 | EPI ISL 175649 | 8 segments | China | Other Database Import                                                                                                          | EpiFluDB       |
| A/silkie chicken/Dongguan/3605/2013 | EPI ISL 175709 | 8 segments | China | Other Database Import                                                                                                          | EpiFluDB       |
| A/silkie chicken/Dongguan/3606/2013 | EPI ISL 175710 | 8 segments | China | Other Database Import                                                                                                          | EpiFluDB       |
| A/silkie chicken/Huzhou/4213/2013   | EPI ISL 175781 | 8 segments | China | Other Database Import                                                                                                          | EpiFluDB       |
| A/silkie chicken/Shaoxing/5130/2013 | EPI ISL 175789 | 8 segments | China | Other Database Import                                                                                                          | EpiFluDB       |
| A/silkie chicken/Shaoxing/5235/2013 | EPI ISL 175820 | 8 segments | China | Other Database Import                                                                                                          | EpiFluDB       |
| A/silkie chicken/Shenzhen/3781/2013 | EPI ISL 175714 | 8 segments | China | Other Database Import                                                                                                          | EpiFluDB       |
| A/silkie chicken/Shenzhen/3782/2013 | EPI ISL 175715 | 8 segments | China | Other Database Import                                                                                                          | EpiFluDB       |

|                                  |                |            |       |                                                                                                          |             |
|----------------------------------|----------------|------------|-------|----------------------------------------------------------------------------------------------------------|-------------|
| A/Suzhou/3/2013                  | EPI ISL 153010 | 8 segments | China | Other Database Import                                                                                    | EpiFluDB    |
| A/Suzhou/5/2013                  | EPI ISL 153012 | 8 segments | China | Other Database Import                                                                                    | EpiFluDB    |
| A/tree sparrow/Shanghai/01/2013  | EPI ISL 156527 | 8 segments | China | Other Database Import                                                                                    | EpiFluDB    |
| A/wild pigeon/Jiangsu/SD001/2013 | EPI ISL 142901 | 8 segments | China | Harbin Veterinary Research Institute (CAAS)                                                              | Kong Huihui |
| A/Wuxi/2/2013                    | EPI ISL 145652 | 8 segments | China | Other Database Import                                                                                    | EpiFluDB    |
| A/Xinjiang/05916/2014            | EPI ISL 172818 | 8 segments | China | WHO Chinese National Influenza Center                                                                    | Yang Lei    |
| A/Xinjiang/73030/2014            | EPI ISL 192391 | 8 segments | China | WHO Chinese National Influenza Center                                                                    | Yang Lei    |
| A/Xinjiang/75802/2014            | EPI ISL 192380 | 8 segments | China | WHO Chinese National Influenza Center                                                                    | Yang Lei    |
| A/Xinjiang/98692/2014            | EPI ISL 172826 | 8 segments | China | WHO Chinese National Influenza Center                                                                    | Yang Lei    |
| A/XinjiangBintuan/99117/2014     | EPI ISL 172824 | 8 segments | China | WHO Chinese National Influenza Center                                                                    | Yang Lei    |
| A/Zhejiang/1/2013                | EPI ISL 139652 | 8 segments | China | Zhejiang Provincial Center for Disease Control and Prevention                                            | Sun Yi      |
| A/Zhejiang/1/2017                | EPI ISL 242856 | 8 segments | China | WHO Chinese National Influenza Center /<br>Zhejiang Provincial Center for Disease Control and Prevention | Yang Lei    |
| A/Zhejiang/10/2016               | EPI ISL 242863 | 8 segments | China | WHO Chinese National Influenza Center /<br>Zhejiang Provincial Center for Disease Control and Prevention | Yang Lei    |
| A/Zhejiang/11/2015               | EPI ISL 192503 | 8 segments | China | WHO Chinese National Influenza Center                                                                    | Yang Lei    |
| A/Zhejiang/12/2016               | EPI ISL 242861 | 8 segments | China | WHO Chinese National Influenza Center /<br>Zhejiang Provincial Center for Disease Control and Prevention | Yang Lei    |
| A/Zhejiang/13/2016               | EPI ISL 242860 | 8 segments | China | WHO Chinese National Influenza Center /<br>Zhejiang Provincial Center for Disease Control and Prevention | Yang Lei    |
| A/Zhejiang/15/2016               | EPI ISL 242858 | 8 segments | China | WHO Chinese National Influenza Center /<br>Zhejiang Provincial Center for Disease Control and Prevention | Yang Lei    |
| A/Zhejiang/17/2014               | EPI ISL 169131 | 8 segments | China | Zhejiang Provincial Center for Disease Control and Prevention                                            | Sun Yi      |
| A/Zhejiang/17/2016               | EPI ISL 242853 | 8 segments | China | WHO Chinese National Influenza Center /<br>Zhejiang Provincial Center for Disease Control and Prevention | Yang Lei    |
| A/Zhejiang/18/2016               | EPI ISL 242852 | 8 segments | China | WHO Chinese National Influenza Center /<br>Zhejiang Provincial Center for Disease Control and Prevention | Yang Lei    |
| A/Zhejiang/2/2017                | EPI ISL 242855 | 8 segments | China | WHO Chinese National Influenza Center /                                                                  | Yang Lei    |



---

|                    |                |                    |       |                                                                                                                                                                           |          |
|--------------------|----------------|--------------------|-------|---------------------------------------------------------------------------------------------------------------------------------------------------------------------------|----------|
| A/Zhejiang/20/2016 | EPI ISL 242849 | 8 segments         | China | Zhejiang Provincial Center for Disease Control and Prevention<br>WHO Chinese National Influenza Center /<br>Zhejiang Provincial Center for Disease Control and Prevention | Yang Lei |
| A/Zhejiang/3/2017  | EPI ISL 242867 | 8 segments         | China | WHO Chinese National Influenza Center /<br>Zhejiang Provincial Center for Disease Control and Prevention                                                                  | Yang Lei |
| A/Zhejiang/32/2013 | EPI ISL 148299 | 3 segments (4,7,8) | China | Other Database Import                                                                                                                                                     | EpiFluDB |
| A/Zhejiang/36/2014 | EPI ISL 192292 | 8 segments         | China | WHO Chinese National Influenza Center                                                                                                                                     | Yang Lei |
| A/Zhejiang/4/2017  | EPI ISL 242851 | 8 segments         | China | WHO Chinese National Influenza Center /Zhejiang Provincial<br>Center for Disease Control and Prevention                                                                   | Yang Lei |
| A/Zhejiang/5/2017  | EPI ISL 242848 | 8 segments         | China | WHO Chinese National Influenza Center /<br>Zhejiang Provincial Center for Disease Control and Prevention                                                                  | Yang Lei |
| A/Zhejiang/6/2016  | EPI ISL 242866 | 8 segments         | China | WHO Chinese National Influenza Center /<br>Zhejiang Provincial Center for Disease Control and Prevention                                                                  | Yang Lei |
| A/Zhejiang/6/2017  | EPI ISL 242847 | 8 segments         | China | WHO Chinese National Influenza Center /<br>Zhejiang Provincial Center for Disease Control and Prevention                                                                  | Yang Lei |
| A/Zhejiang/7/2015  | EPI ISL 192498 | 8 segments         | China | WHO Chinese National Influenza Center                                                                                                                                     | Yang Lei |
| A/Zhejiang/7/2016  | EPI ISL 242854 | 8 segments         | China | WHO Chinese National Influenza Center /<br>Zhejiang Provincial Center for Disease Control and Prevention                                                                  | Yang Lei |
| A/Zhejiang/8/2015  | EPI ISL 192497 | 8 segments         | China | WHO Chinese National Influenza Center                                                                                                                                     | Yang Lei |

---

**Supplementary Figure S1.** S1 shows phylogenetic trees of PB2 and PB1 genes of H7N9 viruses. Solid red circles indicate CK/J1 and CK/J2 found in this study. Solid green triangles indicate avian source H7N9 strains. Solid blue squares indicate human source H7N9 strains. Strains detected in the Yangtze River Delta region are indicated by red lines, whereas those detected in the Pearl River Delta region are indicated by blue lines. Strains found in regions other than the above two areas were considered to be from other regions and are indicated by green lines. Yellow shadows show novel human HP strains found in 2017 in Guangdong; the blue shadow shows the two chicken strains found in this study. All sequences involved in phylogenetic trees were aligned using Clustal W and built using the neighbor-joining method (1000 replicates) in MEGA 7.0. Abbreviations: YRD (Yangtze River Delta), PRD (Pearl River Delta), OR (other regions), W3 (the 3rd wave epidemic), W4 (the 4th wave epidemic).

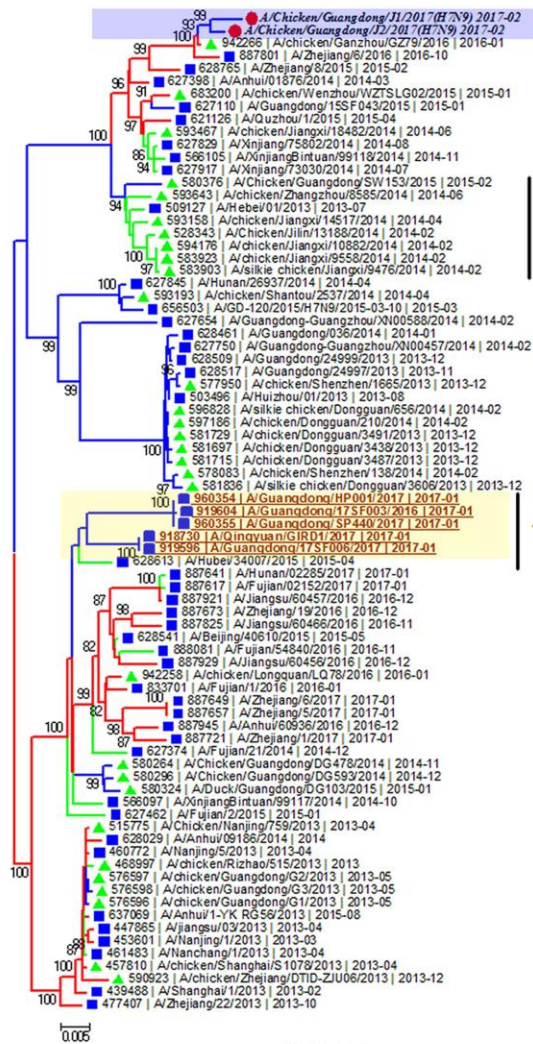

PB2

W3/W4-like

YRD II

OR

PRD

W3-like

YRD I

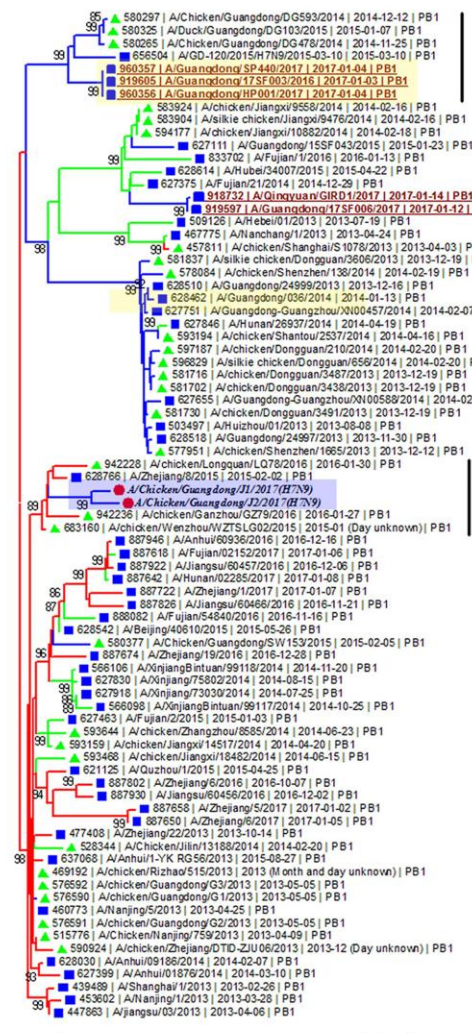

PB1

PRD II (W3-like)

W3-like

OR

PRD I

W3/W4-like

YRD

**Supplementary Figure S2.** S2 shows phylogenetic trees of PA and HA genes of H7N9 viruses. Solid red circles indicate CK/J1 and CK/J2 found in this study. Solid green triangles indicate avian H7N9 strains. Solid blue squares indicate human H7N9 strains. Strains detected in the Yangtze River Delta region are indicated by red lines, whereas those detected in the Pearl River Delta region are indicated by blue lines. Strains found in regions other than the above two areas were considered to be from other regions and are indicated by green lines. Yellow shadows show novel human HP strains found in 2017 in Guangdong; the blue shadow shows the two chicken strains found in this study. All sequences involved in phylogenetic trees were aligned using Clustal W and built using the neighbor-joining method (1000 replicates) in MEGA 7.0. Abbreviations: YRD (Yangtze River Delta), PRD (Pearl River Delta), OR (other regions), W3 (the 3rd wave epidemic), W4 (the 4th wave epidemic).

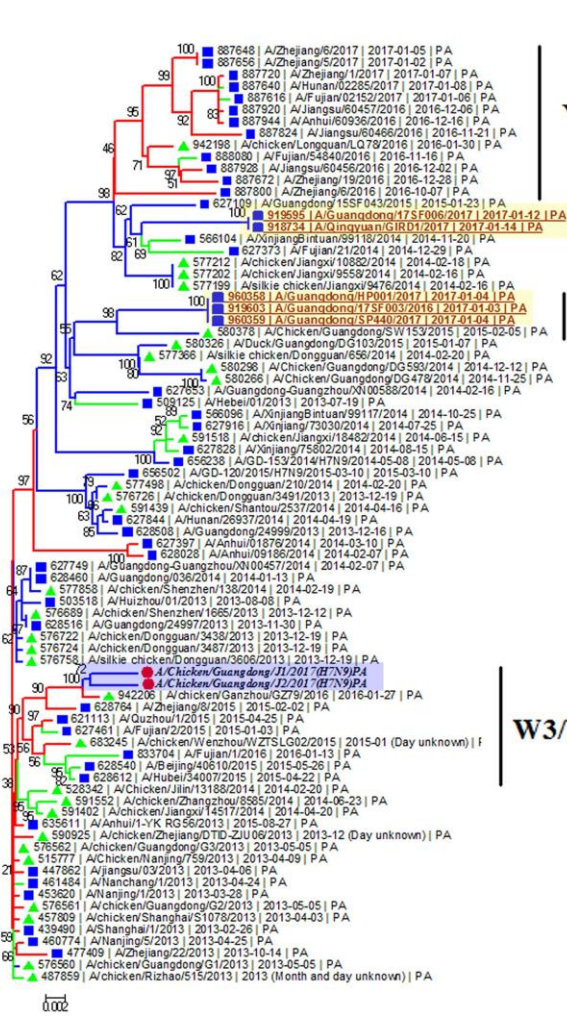

YRD II

W3-like

PRD III

W3-like

PRD II

PRD I

W3/W4-like

YRD I

PA

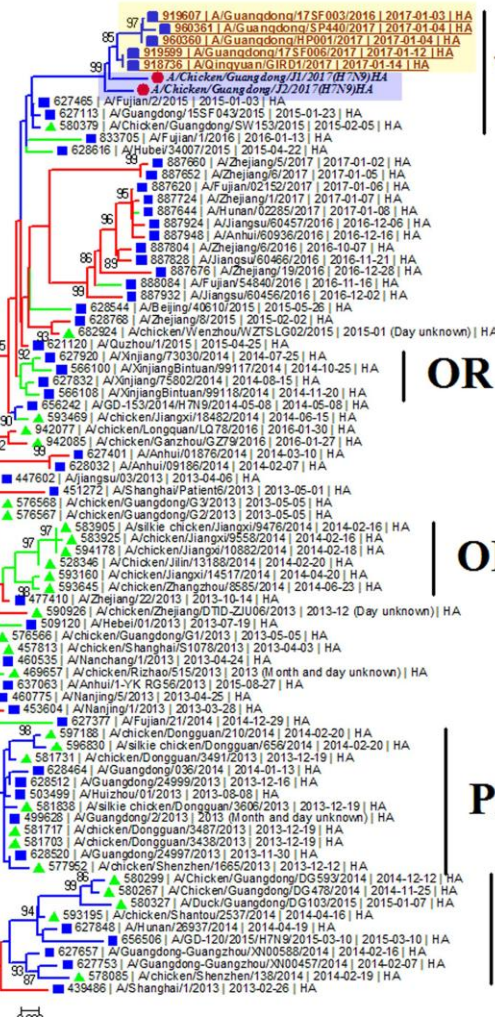

W3-like

PRD III

OR II

OR I

PRD I

PRD II

HA

**Supplementary Figure S3.** S3 shows phylogenetic trees of NP and NA genes of H7N9 viruses. Solid red circles indicate CK/J1 and CK/J2 found in this study. Solid green triangles indicate avian H7N9 strains. Solid blue squares indicate human H7N9 strains. Strains detected in the Yangtze River Delta region are indicated by red lines, whereas those detected in the Pearl River Delta region are indicated by blue lines. Strains found in regions other than the above two areas were considered to be from other regions and are indicated by green lines. Yellow shadows show novel human HP strains found in 2017 in Guangdong; the blue shadow shows the two chicken strains found in this study. All sequences involved in phylogenetic trees were aligned using Clustal W and built using the neighbor-joining method (1000 replicates) in MEGA 7.0. Abbreviations: YRD (Yangtze River Delta), PRD (Pearl River Delta), OR (other regions), W3 (the 3rd wave epidemic), W5 (the 5th wave epidemic).

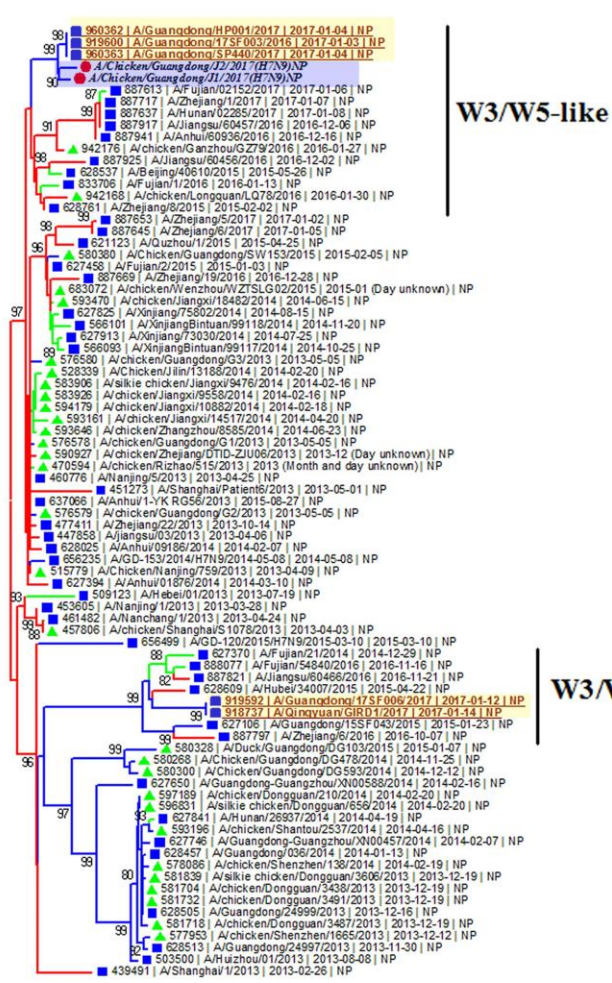

NP

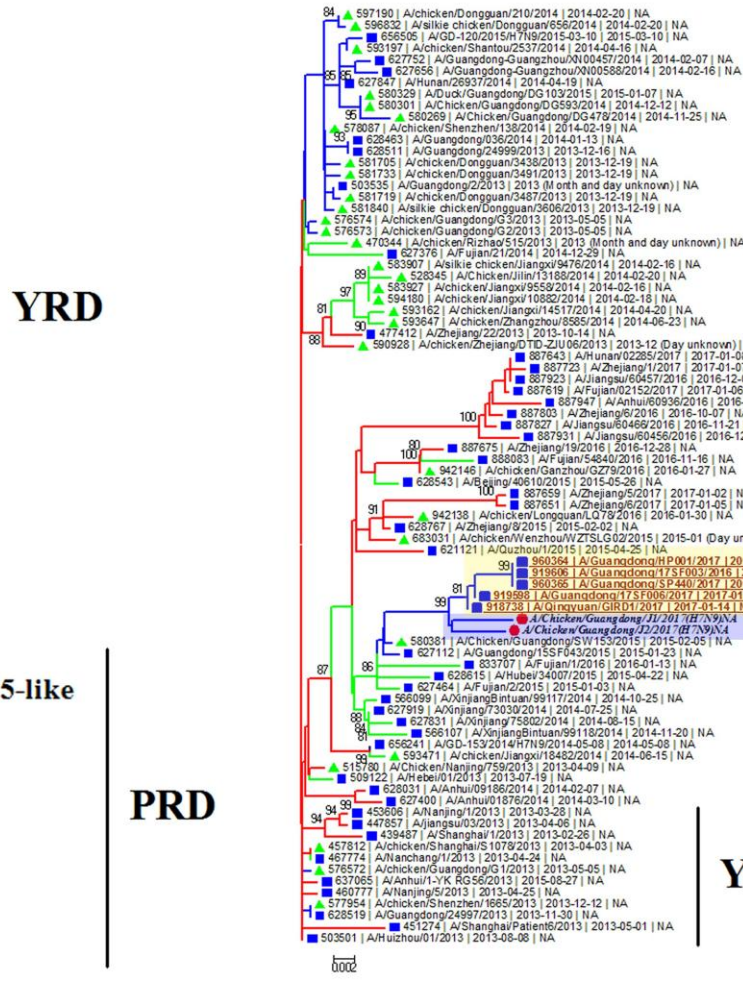

NA

**Supplementary Figure S4.** S4 shows phylogenetic trees of M and NS genes of H7N9 viruses. Solid red circles indicate CK/J1 and CK/J2 found in this study. Solid green triangles indicate avian H7N9 strains. Solid blue squares indicate human H7N9 strains. Strains detected in the Yangtze River Delta region are indicated by red lines, whereas those detected in the Pearl River Delta region are indicated by blue lines. Strains found in regions other than the above two areas were considered to be from other regions and are indicated by green lines. Yellow shadows show novel human HP strains found in 2017 in Guangdong; the blue shadow shows the two chicken strains found in this study. All sequences involved in phylogenetic trees were aligned using Clustal W and built using the neighbor-joining method (1000 replicates) in MEGA 7.0. Abbreviations: YRD (Yangtze River Delta), PRD (Pearl River Delta), OR (other regions), W1, W2, W3, W4 and W5 (the 1st to 5th wave epidemic).



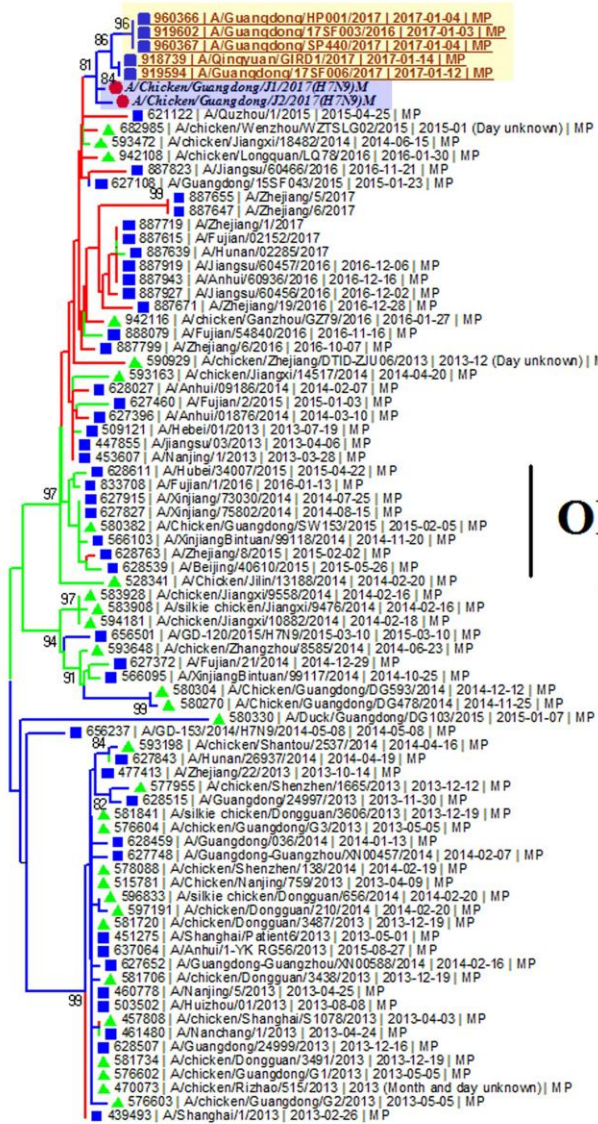

W3/W4-like

YRD

OR II

OR I

PRD

M

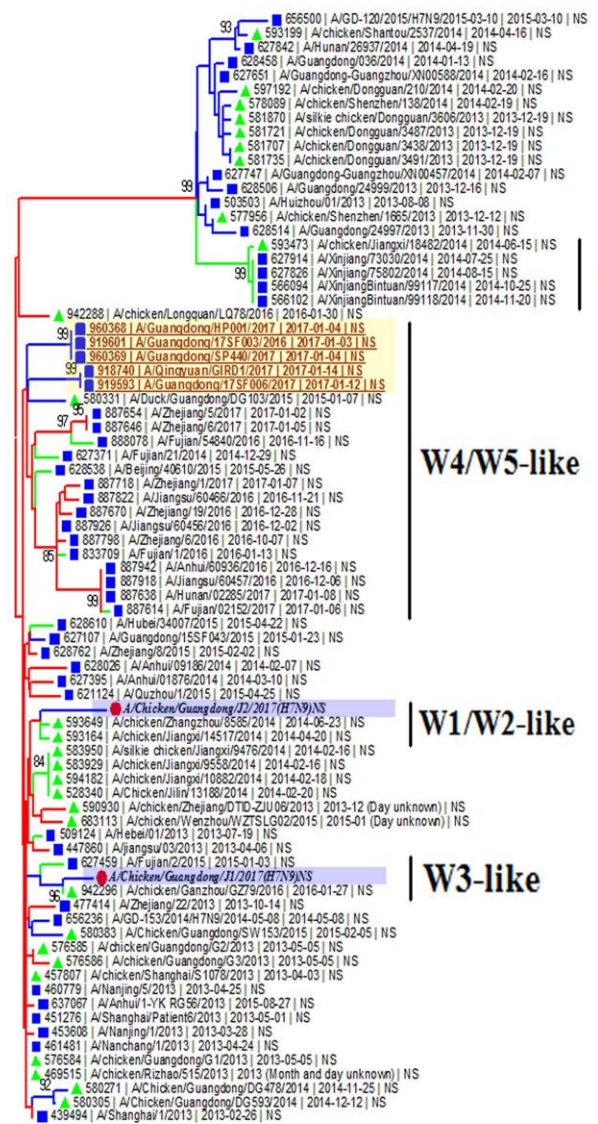

PRD

OR

W4/W5-like

W1/W2-like

YRD

W3-like

NS
